# 1 **Semaphorin7A patterns neural circuitry** 2 **in the lateral line of the zebrafish**

3 Agnik Dasgupta<sup>1,\*</sup>, Sang P. Paik<sup>1,2</sup>, Lauren M. Snow<sup>1,3</sup>, and A. J. Hudspeth<sup>1,\*</sup>

4 <sup>1</sup> Howard Hughes Medical Institute and Laboratory of Sensory Neuroscience, The Rockefeller  
5 University, New York, NY, USA

6 \*Corresponding author: Dr. Agnik Dasgupta  
7 Laboratory of Sensory Neuroscience  
8 The Rockefeller University  
9 New York, NY 10065  
10 Telephone: 212-327-7353  
11 E-mail: [adasgupta@rockefeller.edu](mailto:adasgupta@rockefeller.edu)

12 <sup>2</sup> Present address: Department of Functional Neuroanatomy, Institute for Anatomy and Cell  
13 Biology, Heidelberg University, Heidelberg, Germany

14 <sup>3</sup> Present address: Brigham and Women's Hospital, Boston, MA, USA

15

## 16 **Abstract**

17 In a developing nervous system, axonal arbors often undergo complex rearrangements before  
18 neural circuits attain their final innervation topology. In the lateral line sensory system of the  
19 zebrafish, developing sensory axons reorganize their terminal arborization patterns to establish  
20 precise neural microcircuits around the mechanosensory hair cells. However, a quantitative  
21 understanding of the changes in the sensory arbor morphology and the regulators behind the  
22 microcircuit assembly remain enigmatic. Here, we report that Semaphorin7A (Sema7A) acts  
23 as an important mediator of these processes. Utilizing a semi-automated three-dimensional  
24 neurite tracing methodology and computational techniques, we have quantitatively analyzed  
25 the morphology of the sensory arbors in wild-type and Sema7A loss-of-function mutants. In  
26 contrast to those of wild-type animals, the sensory axons in Sema7A mutants display aberrant  
27 arborizations with diminished contacts to hair cells. Moreover, ectopic expression of a secreted  
28 form of Sema7A by non-hair cells induces chemotropic guidance of sensory axons. Our  
29 findings demonstrate that Sema7A functions both as a juxtacrine and as a secreted cue to  
30 pattern neural circuitry during sensory organ development.

## 31 **Introduction**

32 Pathfinding axons are directed to their appropriate synaptic targets by a variety of guidance  
33 cues. While approaching or traversing the target field, the growth cones of migrating axons  
34 encounter secreted or cell surface-attached ligands and respond by steering toward or away  
35 from their sources (1–4). Fine-grained control of these factors is critical for the establishment  
36 of proper neural circuitry.

37 The zebrafish's lateral line provides a tractable *in vivo* system for exploring the  
38 mechanisms that guide the assembly of neural circuits in a peripheral nervous system. In  
39 particular, it is possible to detect individual hair cells and the sensory axons that innervate them  
40 throughout the first week of development (5). The primary posterior lateral line on each side of  
41 the zebrafish's tail consists of about seven neuromasts, which contain mechanoreceptive hair  
42 cells of opposing polarities—half sensitive to headward (rostrad) water motion and the

43 complementary half to tailward (caudad) water motion—that cluster at their centers (6). The  
44 sensory axons of the lateral-line nerve branch, arborize, and consolidate around the basolateral  
45 surfaces of the hair cells (Fig. 1A). To aid in an animal’s swimming behavior, these hair cells  
46 sense water currents and relay signals to the brain through the sensory axons (7). The well-  
47 defined structure of the ramifications and synaptic contacts of the sensory axons highlight the  
48 need to determine the molecular signals behind the assembly of such precise microcircuits (8).

49 We adopted a candidate-gene strategy to seek factors that direct the growth of afferent  
50 growth cones in the zebrafish's lateral line. Analysis of a single-cell RNA sequencing data  
51 identified the *semaphorin7a* (*sema7a*) gene to be highly expressed in hair cells of that organ  
52 (9). Semaphorins are important regulators of axonal growth and target finding during the  
53 patterning of diverse nervous systems (10). The semaphorin family includes proteins that are  
54 secreted, transmembrane, and cell surface-attached (11). Among these, Semaphorin7A  
55 (Sema7A) is the only molecule that is anchored to the outer leaflet of the lipid bilayer of the cell  
56 membrane by a glycosylphosphatidylinositol (GPI) linker (11). Unlike many other semaphorins,  
57 which act as repulsive cues (12,13), Sema7A is involved in promoting axon growth (4) and  
58 imparting directional signals by interacting with the integrin and plexin families of receptors  
59 residing on the pathfinding axons (14–16). Sema7A likely occurs *in vivo* in both GPI-anchored  
60 and soluble forms (17–19), and studies of neuronal explants confirm that both forms can induce  
61 directed axonal outgrowth (4). Furthermore, it has been proposed that the GPI anchor is  
62 cleaved by membrane-resident GPI-specific phospholipases (GPI-PLs) or matrix  
63 metalloproteases to release the Sema7A into the extracellular environment and thus regulate  
64 dynamic cellular processes (20,21). Because these observations indicate that Sema7A might  
65 influence neuronal development both as a juxtacrine and as a diffusive signal, we investigated  
66 the role of Sema7A in sculpting a vertebrate peripheral sensory organ.

## 67 **Results**

68 **Sema7A expression and localization in hair cells.** The zebrafish genome contains a single  
69 *sema7a* gene that produces two transcripts. One transcript encodes Sema7A-GPI, a full-

70 length, GPI-linked, cell surface-attached protein. The second transcript yields Sema7A<sup>sec</sup>, a  
71 protein with a truncated C-terminus, which we conjecture is secreted into the local environment.  
72 Each transcript encodes an N-terminal signal sequence and a single copy of the conserved  
73 sema domain (11). Using primers that flank the regions encoding the sema domain and the  
74 distinct C-termini of the two transcripts, we performed reverse transcription and polymerase  
75 chain reactions (RT-PCR) to identify both the membrane-anchored and the secreted transcript  
76 in developing larvae (Fig. 1B; Fig. S1A). Single-cell RNA sequencing data also have shown  
77 that the *sema7a* transcript is particularly enriched in the immature and mature hair cells of the  
78 neuromast during early larval development (9), a period when sensory axons of the posterior  
79 lateral line contact hair cells and form synapses with them (5,22). Indeed, we have observed  
80 Sema7A to be specifically localized in both mature and immature hair cells (Fig. 1C;  
81 Fig. S1B-E).

82 As neuromasts mature, the contacts between sensory axons and hair cells increase in  
83 number, become stabilized, and establish synapses (5,22). Because Sema7A can modulate  
84 axon guidance (4,14) and synapse formation (15), we wondered whether the level of Sema7A  
85 also changes during neuromast development. Upon quantifying the average intensity of  
86 Sema7A, we found similar expression in rostrally and caudally polarized hair cells of  
87 neuromasts at 1.5, 2, 3, and 4 days post fertilization (dpf). The average Sema7A intensity  
88 increased significantly over this period in both rostrally and caudally polarized hair cells. At  
89 1.5 dpf, the neuromasts harbor primarily immature hair cells that make minimal contacts with  
90 sensory axons and do not form stable association with axonal terminals (22). At this stage the  
91 average Sema7A intensity in hair cells remained low. By 2-4 dpf the hair cells mature to form  
92 stable contacts and well-defined synapses with the sensory axons (5,23). The average  
93 Sema7A intensity in hair cells at each of these stages rose to levels that significantly exceeded  
94 those of 1.5 dpf neuromasts (Fig. 1D). This rise in the amount of Sema7A during neuromast  
95 maturation supports a role for Sema7A in the guidance of sensory axons and their interaction  
96 with hair cells.



97 We additionally demonstrated an anisotropic distribution of Sema7A along the  
98 apicobasal axis of each hair cell. As neuromasts develop through 2, 3, and 4 dpf, Sema7A  
99 remained highly enriched in the subapical region of the hair cell, the site of the Golgi network.  
100 This localization suggests that Sema7A—like other proteins of the semaphorin family (24)—is  
101 directed to the plasmalemma through Golgi-mediated vesicular trafficking. While Sema7A  
102 maintained a high level in the subapical region, the protein increasingly accumulated at the  
103 base of the hair cell: the Sema7A level at the hair cell base was low at 2 dpf, but increased  
104 sharply by 3 dpf and 4 dpf (Fig. 1E; Fig. S1F,G). During this period the hair cells increase in  
105 number and mature, whereas the associated sensory axons arborize to contact multiple hair  
106 cells and form robust synaptic boutons at their bases (5,23). The progressive enrichment of  
107 Sema7A at the hair cell base and sensory-axon interface (Fig. 1F; Movie 1) implicates that  
108 Sema7A acts as a potential mediator of contacts between sensory axons and hair cells.

109 **Sema7A patterns sensory axon arborizations.** If Sema7A guides and restricts the sensory  
110 arbors around the hair cells clustered in a neuromast, then inactivating Sema7A function should  
111 disrupt this process. To test this hypothesis, we obtained a *sema7a* mutant allele  
112 (*sema7a<sup>sa24691</sup>*) with a point mutation that introduces a premature stop codon in the conserved  
113 sema domain (Fig. S2A). The homozygous mutant, hereafter designated *sema7a<sup>-/-</sup>*, should  
114 lack both the secreted and the membrane-attached forms of Sema7A. The average intensity  
115 of Sema7A immunolabeling in hair cells diminished by 61% in *sema7a<sup>-/-</sup>* larvae ( $0.34 \pm 0.01$   
116 arbitrary units) in comparison to controls ( $0.87 \pm 0.01$  arbitrary units). In a few cases we  
117 observed minute accumulations of Sema7A at the subapical region, but little or no protein at  
118 the base of the mutant hair cells (Fig. 2A; Fig. S2B).

119 To characterize the impact of the *sema7a<sup>-/-</sup>* mutation on arbor patterning, we utilized  
120 doubly labeled transgenic fish *Tg(myo6b:actb1-EGFP;neurod1:tdTomato)* that marked the hair  
121 cells and the sensory axons of the posterior lateral line with distinct fluorophores (25). In control  
122 neuromasts, the sensory axons approached, arborized, and consolidated around the bases of  
123 clustered hair cells (Fig. 2B). Although the sensory axons approached the hair cells of  
124 *sema7a<sup>-/-</sup>* neuromasts, they displayed aberrant arborization patterns with wayward projections

125 that extended transversely to the organ (Fig. 2C). To quantitatively analyze the arborization  
126 morphology, we traced the sensory arbors in three dimensions to generate skeletonized  
127 network traces that depict—as pseudocolored trajectories—the increase in arbor length from the  
128 point of arborization (Fig. 2D,E).

129 To visualize the hair cell clusters and associated arborization networks from multiple  
130 neuromasts, we aligned images of hair cell clusters, registered them at their hair bundles, from  
131 neuromasts at 2 dpf, 3 dpf, and 4 dpf. Throughout development, the arborization networks of  
132 control neuromasts largely remained within the contours of the hair cell clusters; the few that  
133 reached farther nonetheless lingered nearby (Fig. 2F). This result suggests that an attractive  
134 cue retained the axons near the sensory organ. In *sema7a*<sup>-/-</sup> neuromasts, however the neuronal  
135 arbors failed to consolidate within the boundaries of hair cell clusters and extended far beyond  
136 them (Fig. 2G; Fig. S2C-H; Movie 2).

137 We quantified the distribution of the sensory arbors around the center of the combined  
138 hair cell clusters. For both the control and the *sema7a*<sup>-/-</sup> neuromasts, the arbor densities peaked  
139 proximal to the boundaries of the hair cell clusters. Beyond the cluster boundaries, in control  
140 neuromasts at 2 dpf, 3 dpf, and 4 dpf the arbor densities fell sharply at respectively 31.7  $\mu\text{m}$ ,  
141 36.6  $\mu\text{m}$ , and 32.7  $\mu\text{m}$  from the center. In *sema7a*<sup>-/-</sup> neuromasts of the same ages, the sensory  
142 arbors extended respectively 38.5  $\mu\text{m}$ , 51.4  $\mu\text{m}$ , and 56.6  $\mu\text{m}$  from the center (Fig. 2H;  
143 Fig. S2I-J; Fig. S5A). Furthermore, we quantified the degree of contact of the sensory arbors  
144 to their hair cell clusters in individual neuromasts from both control and *sema7a*<sup>-/-</sup> mutants. In  
145 control neuromasts, the degree of contact was  $83 \pm 1$  % (mean  $\pm$  SEM) at 2 dpf and  $84 \pm 1$  %  
146 at 3 dpf, but significantly increased to  $90 \pm 1$  % at 4 dpf (Fig. 2I; Fig. S5B). This observation  
147 indicates that the sensory arbors reinforce their association to the hair cell clusters as  
148 neuromasts develop. However, in *sema7a*<sup>-/-</sup> neuromasts such contact was significantly  
149 reduced. Only  $69 \pm 4$  % of sensory arbors at 2 dpf were closely associated with the  
150 corresponding hair cell clusters, a value that remained at  $67 \pm 2$  % at both 3 dpf and 4 dpf  
151 (Fig. 2I). These findings signify that simultaneous disruption of both signaling modalities of

152   Sema7A fails to restrict sensory arbors within a neuromast and significantly diminishes their  
153   contact with hair cells.

154   ***Sema7A<sup>sec</sup> is a sufficient chemoattractive cue for sensory axon guidance.*** Because  
155   genetic inactivation of the *sema7a* gene disrupts both signaling modalities of the cognate  
156   protein, we could not assess the specific activity of the Sema7A<sup>sec</sup> diffusible cue in guiding  
157   lateral-line sensory axons. To independently verify the potential role of that isoform, we  
158   therefore expressed the secreted variant ectopically and investigated the resultant arborization  
159   patterns.

160         Analysis of the microcircuit connectivity of the neuromasts has demonstrated bare  
161   sensory-axonal terminals in the perisynaptic compartments, where they do not contact the hair  
162   cell membrane (8). We speculate that these bare terminals are attracted by a Sema7A<sup>sec</sup>  
163   diffusible cue. To test this hypothesis, we ectopically expressed Sema7A<sup>sec</sup> protein tagged with  
164   the fluorophore mKate2, then analyzed its effect on the morphology of sensory arbors.  
165   Fertilized one-cell embryos were injected with the *hsp70:sema7a<sup>sec</sup>-mKate2* plasmid and  
166   raised to 3 dpf. Larvae expressing the transgenesis marker—the lens-specific red fluorescent  
167   protein mCherry—were heat-shocked, incubated to allow expression, and subsequently  
168   mounted for live imaging. In these larvae, a random mosaic of cells—often embryonic muscle  
169   progenitors in the dermomyotome or mature myofibers—expressed the exogenous  
170   Sema7A<sup>sec</sup>-mKate2 protein. We selected only those neuromasts in which an ectopic integration  
171   had occurred near the network of sensory arbors (Fig. 3A,B). In all 22 such cases, we observed  
172   robust axonal projections from the sensory arbor network toward the ectopically expressing  
173   Sema7A<sup>sec</sup> cells. When the exogenous *sema7a<sup>sec</sup>* integration occurred in embryonic muscle  
174   progenitor cells, which reside in a superficial layer external to the muscle fibers and adjacent  
175   to the larval skin (26), the projections were able to form direct contacts with them (Fig. 3C;  
176   Movies 3,4). But more often, when mature myofibers expressed the exogenous Sema7A<sup>sec</sup>  
177   deep in the myotome, the axonal projections approached those targets but failed to contact  
178   them (Fig. 3D, Movies 5,6). This behavior likely arose because other components in the  
179   myotomal niche—including the fibrous epimysium, other myofibers, myoblasts, and immature

180 myotubes whose surroundings are permeable to diverse diffusive cues (27)—physically  
181 obstructed direct interaction of the extended neurites with the ectopically expressing myofibers.  
182 All 18 of the injected but not heat-shocked control larvae did not express ectopic  $\text{Sema7A}^{\text{sec}}$ ,  
183 and we did not observe aberrant projections from the sensory arbor network (Fig. 3E).

184 To measure the accuracy of the extended axonal projections in finding the ectopic  
185  $\text{Sema7A}^{\text{sec}}$  source, we defined three parameters: (1) the source path, denoted as the linear  
186 distance from the point of arborization to the boundary of an ectopically expressing  $\text{Sema7A}^{\text{sec}}$   
187 cell; (2) the projection path, representing the linear distance from the point of arborization to  
188 the terminus of the extended projection; and (3) the projection proximity, calculated as the  
189 linear distance from the terminus of the extended axonal projection to the nearest boundary of  
190 the ectopically expressing  $\text{Sema7A}^{\text{sec}}$  cell (Fig. 3B). We quantified these parameters from 18  
191 of the 22 mosaic integration events; in the remainder the extended axonal projections—although  
192 following the ectopic source—reentered the posterior lateral line nerve so that identification of  
193 the axon terminals was not possible (Fig. S2A-A"; Movie 7). When we plotted the projection  
194 path length against the source-path length, we observed a nearly perfect correlation (Fig. 3F).  
195 This result signifies that irrespective of the location of the ectopic source—whether proximal or  
196 distal to the sensory arbor network—the  $\text{Sema7A}^{\text{sec}}$  cue sufficed to attract axonal terminals from  
197 the sensory arbor. Furthermore, the low average projection-proximity length of  $3.5 \pm 0.7 \mu\text{m}$   
198 (mean  $\pm$  SEM) indicated that the extended projection terminals remained either in contact (8 of  
199 18) or in the vicinity (10 of 18) of the ectopic  $\text{Sema7A}^{\text{sec}}$  sources (Fig. 3G). These observations  
200 together demonstrate that the  $\text{Sema7A}^{\text{sec}}$  diffusive cue is sufficient to provide neural guidance  
201 *in vivo*.

202 As the posterior lateral-line ganglion matures, newly formed neurons extend their axonal  
203 growth cones along the posterior lateral-line nerve to reach the neuromasts (28). We wondered  
204 whether the axonal projections that had yet to be associated with a neuromast could also  
205 respond to an ectopic source of  $\text{Sema7A}^{\text{sec}}$ . Indeed, on five occasions in which  $\text{sema7a}^{\text{sec}}$   
206 integration had occurred between two neuromasts, we detected neurite extensions from the  
207 posterior lateral-line nerve to the ectopic  $\text{Sema7A}^{\text{sec}}$  source (Fig. S3B-B"; Movies 8-10). The

208 responsiveness of the posterior lateral line axons to  $\text{Sema7A}^{\text{sec}}$  might therefore be an intrinsic  
209 property of the neurons that does not require the neuromast microenvironment.

210 ***Effect of Sema7a deficiency on synaptic assembly.*** Contact stabilization between an axon  
211 and its target cell is essential for synapse formation (29). Neural GPI-anchored proteins can  
212 act as regulators of various synaptic-adhesion pathways (30). In the mouse olfactory system,  
213 GPI-anchored Sema7A is enriched in olfactory sensory axons and mediates sustained  
214 interaction with the dendrites of mitral and tufted cells in the olfactory bulb to establish synapses  
215 (15). In the developing mouse brain—particularly in Purkinje cells—GPI-anchored Sema7A  
216 instead regulates the elimination of synapses onto climbing fibers (31). The role of anchored  
217 Sema7A in regulating synaptic architecture can thus vary according to the cell type and  
218 developmental stage. Our demonstration that Sema7A is necessary to consolidate the contact  
219 between sensory axons and hair cells during neuromast development suggests a possible role  
220 in regulating synaptic structure.

221 Proper synaptogenesis requires the correct spatial organization of the presynaptic and  
222 postsynaptic apparatus at the apposition of two cells. At the interface between hair cells and  
223 sensory axons, the synaptic network involves two scaffolding proteins in particular: ribeye, a  
224 major constituent of the presynaptic ribbons (32), and membrane-associated guanylate kinase  
225 (MAGUK), a conserved group of proteins that organize postsynaptic densities (33). Utilizing  
226 these scaffolding proteins as markers, we investigated the impact of the *sema7a*<sup>-/-</sup> mutation on  
227 synapse formation. To analyze the distribution of presynaptic densities—immunolabeled with  
228 an antibody against the ribeye-associated presynaptic constituent C-terminal binding protein  
229 (CTBP) (32)—we counted the number and measured the area of CTBP punctae from multiple  
230 neuromasts at several stages of neuromast development (Fig. 4A,B). The CTBP punctae in  
231 each hair cell ranged from zero to seven across developmental stages. In the zebrafish's  
232 posterior lateral line, the formation of presynaptic ribbons is an intrinsic property of the hair cells  
233 that does not require contact with lateral-line sensory axons. However, sustained contact with  
234 the sensory axon influences the maintenance and stability of ribbons (34). As neuromasts  
235 matured from 2 dpf to 4 dpf, we identified similar distribution patterns with a characteristic

236 increase in the number of CTBP punctae in both control and *sema7a*<sup>-/-</sup> larvae (Fig. 4C,D). This  
237 result implies that the formation of new presynaptic ribbons is not perturbed in the mutants,  
238 even though there are on average fewer CTBP punctae (Fig. S4A-C). Measurement of the  
239 areas of CTBP punctae also showed similar distributions in both genotypes (Fig. 4E,F) but the  
240 average area of presynaptic densities was reduced in the mutants (Fig. S4D-F).

241 Because GPI-anchored Sema7A lacks a cytosolic domain, it is unlikely that Sema7A  
242 signaling directly induces formation of presynaptic ribbons. Instead, GPI-anchored Sema7A  
243 might induce postsynaptic assembly on the apposed neuronal membrane (15). To characterize  
244 the distribution of the postsynaptic aggregates—immunostained with a pan-MAGUK antibody—  
245 we performed analyses similar to those above (Fig. 4I,J). At 4 dpf, 68.3 % of the hair cells in  
246 the control neuromasts were associated with at least one MAGUK punctum. In the  
247 *sema7a*<sup>-/-</sup> mutant this value fell to 37.5 % (Fig. 4K,L). The average number of MAGUK punctae  
248 also declined in the mutants (Fig. S4G-I). As control neuromasts matured from 2 dpf to 4 dpf,  
249 the MAGUK punctae showed a shift toward smaller sizes, suggesting that the postsynaptic  
250 structure fragmented into smaller entities as observed in other excitatory synapses (35). At  
251 4 dpf, 77.5 % of the hair cells in the control neuromasts had postsynaptic densities with areas  
252 between 0.10  $\mu\text{m}^2$  and 0.40  $\mu\text{m}^2$ . In the *sema7a*<sup>-/-</sup> mutant the corresponding value was only  
253 42.5 % (Fig. 4M,N). The average area of MAGUK punctae was also reduced in the mutants  
254 compared to the controls (Fig. S4J-L). We speculate that the abnormalities in postsynaptic  
255 structure arose from reduced contact between the hair cells and the sensory axons in the  
256 *sema7a*<sup>-/-</sup> mutants or from the lack of Sema7A-mediated juxtacrine signaling onto the apposed  
257 neurite terminals (15).

## 258 Discussion

259 The specification of neural circuitry requires precise control of the guidance cues that direct  
260 and restrict neural arbors at their target fields and facilitate synapse formation. In the lateral-  
261 line neuromast of the zebrafish, we have identified Sema7A as an essential cue that regulates  
262 the interaction between hair cells and sensory axons. We have discovered dual modes of



263   Sema7A function *in vivo*: the chemoattractive diffusible form is sufficient to guide the sensory  
264   arbors toward their target, whereas the membrane-attached form likely participates in the  
265   contact-mediated formation and maintenance of synapses. Our results suggest a potential  
266   mechanism for hair cell innervation in which a local Sema7A<sup>sec</sup> diffusive cue consolidates the  
267   sensory arbors at the hair cell cluster and the membrane-anchored Sema7A-GPI molecule  
268   regulates synapse assembly.

269         Recent studies have begun to dissect the molecular mechanisms of semaphorin  
270   signaling in axonal navigation. In explants derived from the murine olfactory bulb, Sema7A  
271   interacts directly with integrin $\beta$ 1 to trigger downstream signaling effectors involving focal  
272   adhesion kinase and mitogen-activated protein kinases, which are critical regulators of the  
273   cytoskeletal network during axonal pathfinding (4,36). Moreover, the interaction between  
274   Sema7A and its receptor plexinC1 activates the rac1-cdc42-PAK pathway, which alters the  
275   actin network to promote axonal guidance and synapse formation (15,37). We speculate that  
276   lateral-line sensory axons utilize similar mechanisms to sense and respond to Sema7A in the  
277   establishment of microcircuits with hair cells.

278         During early development of the posterior lateral line, the growth cones of sensory axons  
279   intimately associate with the prosensory primordium that deposits neuromasts along the lateral  
280   surface of the larva (38,39). The growth of the sensory fibers with the primordium is regulated  
281   by diverse neurotrophic factors expressed in the primordium (40,41). Impairing brain-derived  
282   or glial cell line-derived neurotrophic factors and their receptors perturbs directed axonal  
283   motility and innervation of hair cells (40,41). Lateral-line hair cells are particularly enriched in  
284   brain-derived neurotrophic factor (42) and other chemotropic cues (Fig. S6). Because the  
285   sensory axons of *sema7a*<sup>-/-</sup> mutants reliably branch from the lateral-line nerve to reach hair cell  
286   clusters, these chemoattractive factors might compensate in part for the absence of Sema7A  
287   function. Although sensory axons are strict selectors of hair cell polarity and form synapses  
288   accordingly (5), diverse chemoattractant cues including Sema7A occur uniformly between hair  
289   cell polarities (42). It seems likely that unbiased attractive signals bring sensory arbors toward  
290   hair cells, after which polarity-specific molecules on hair cell surfaces dictate the final

291 association between axonal terminal and hair cells. Notch-delta signaling and its downstream  
292 effectors regulate hair cell polarity and the innervation pattern (6,8,25). It would be interesting  
293 to determine whether Notch-mediated polarity signatures on the hair cell's surface can refine  
294 the neuromast neural circuitry.

## 295 **Materials and Methods**

296 **Zebrafish strains and husbandry.** Experiments were performed on 1.5-4 dpf zebrafish larvae  
297 in accordance with the standards of Rockefeller University's Institutional Animal Care and Use  
298 Committee. Naturally spawned and fertilized eggs were collected, cleaned, staged, and  
299 maintained at 28.5 °C in system-water with 1 µg/mL methylene blue. Wild-type AB and  
300 heterozygous mutant *semaphorin7a*<sup>sa24691</sup> zebrafish were obtained from the Zebrafish  
301 International Resource Center. In addition, the following transgenic zebrafish lines were used:  
302 *Tg(myo6b:actb1-EGFP)* (43), *Tg(neurod1:tdTomato)* (25), and *TgBAC(neurod1:EGFP)* (44).

303 **Genotyping of mutant fish.** The *semaphorin7a*<sup>sa24691</sup> allele harbors an A-to-T point mutation  
304 in the seventh exon of the *semaphorin7a* gene, which creates a premature stop codon (Fig.  
305 S2A). Genomic DNA was isolated from the tail fins of adult *semaphorin7a*<sup>sa24691</sup> (*sema7a*<sup>sa91</sup>)  
306 heterozygous mutant zebrafish. The mutant locus in the genome was PCR amplified using the  
307 following primers: *sema7a*<sup>sa91</sup>F: 5'-AAAGCTGGAAAGCGAATCAA-3' and *sema7a*<sup>sa91</sup>R:  
308 5'-ATATCCAAGGATCCGCCTCT-3'. The 734-base pair amplicons were sequenced, and  
309 heterozygous adults were propagated.

310 **Reverse transcription-polymerase chain reactions (RT PCR).** Total RNA was isolated from  
311 whole zebrafish larvae by TRIzol extraction followed by DNase treatment (TURBO DNA-free  
312 Ambion). We used thirty 4 dpf zebrafish larvae to isolate total RNA. We generated cDNA  
313 libraries using iScript cDNA Synthesis Kit (Bio-Rad). Each transcript was PCR amplified using  
314 the following primers: *sema7a*F: 5'-GGTTTTTCTGAGGCCATTCC-3', *sema7a*R1:  
315 5'-GGCACTCGTGACAAATGCTA-3', *sema7a*R2: 5'-TGTGGAGAAAGTCACAAAGCA-3'  
316 (Fig. S1A).



317 **Transient transgenesis with the hsp70l:sema7a<sup>sec</sup>-mKate2 construct.** The pDNR-LIB  
318 plasmid containing the *sema7a<sup>sec</sup>* coding sequence was purchased from horizon (7140389,  
319 Perkin-Elmer). The coding sequence was PCR amplified using the following primers:  
320 *sema7a<sup>sec</sup>F*:  
321 5′-GGGGACAAGTTTGTACAAAAAAGCAGGCTTGATGATTCGACATTATTCT-3′ and  
322 *sema7a<sup>sec</sup>R*:  
323 5′-GGGGACCACTTTGTACAAGAAAGCTGGGTGCTTTGTGGAGAAAGTCACAAAGCA-3′.  
324 The italicized nucleotides denote the mutated stop codon. The amplicon was then cloned into  
325 the pDONR221 vector by BP recombination to generate the middle entry pME-*sema7a<sup>sec</sup>*  
326 vector. To generate the hsp70:*sema7a<sup>sec</sup>*-mKate2 construct, gateway cloning was performed  
327 by combining the plasmids p5E-hsp70 (45), pME-*sema7a<sup>sec</sup>*, p3E-mKate2-myc no-pA  
328 (Addgene, 80812), and pDESTtol2pACrymCherry (Addgene, 64023) with LR Clonase II Plus  
329 (Invitrogen). Verified constructs (25 ng/μl plasmid DNA) were injected with Tol2 Transposase  
330 mRNA (approximately 25 ng/μl) into one-cell embryos. The transiently transgenic larvae—  
331 identified by the expression of red fluorescent protein (mCherry) in their lenses—were raised  
332 till 3 dpf, heat-shocked in a water bath at 37 °C for 1 hr, incubated at 28 °C for 1 hr to allow  
333 expression, and subsequently mounted for live imaging.

334 **Microscopy and volumetric rendering of living neuronal arbors and cells.** Living larvae  
335 were dechorionated, anaesthetized in 600 μM 3-aminobenzoic acid ethyl ester  
336 methanesulfonate in system-water with 1 μg/mL methylene blue, and mounted in 1 % low-  
337 melting-point agarose on a glass-bottom MetTek dish at specific stages. The larvae were  
338 maintained at 28 °C during imaging in a temperature-controlled stage top chamber (OKO Lab  
339 UNO-T). Images at successive focal depths were captured at 200 nm intervals and  
340 deconvolved with Microvolution software in ImageJ (NIH). The three-dimensional datasets  
341 were processed and volume-rendered with the surface evolver and filament-tracer tools in  
342 Imaris (Bitplane, Belfast, UK). The Imaris workstation was provided by the Rockefeller  
343 University Bio-imaging Resource Center.

344 **Immunofluorescence microscopy.** For the immunofluorescence labeling of wholemounted  
345 wild-type control and *sema7a*<sup>-/-</sup> larvae, 1.5-4 dpf larvae were fixed overnight at 4 °C in 4 %  
346 formaldehyde in phosphate-buffered saline solution (PBS) with 1 % Tween-20 (1 % PBST).  
347 Larvae were washed four times with 1 % PBST for 15 min each, then placed for 2 hr in blocking  
348 solution containing PBS, 2 % normal donkey serum (NDS), 0.5 % Tween-20, and 1 % BSA.  
349 Primary antibodies were diluted in fresh blocking solution and incubated with the specimens  
350 overnight at 4 °C. The primary antibodies were goat anti-Sema7A (1:200; AF1835, R&D  
351 Systems) (14), rabbit anti-myosin VI (1:200; Proteus 25-6791), murine anti-GM130 (1:200;  
352 610822, BD Transduction Laboratories), murine anti-CTBP (1:200; B-3, SC-55502, Santa Cruz  
353 Biotech), and rabbit anti-mCherry (1:200; GTX128508, GeneTex). Larvae were washed four  
354 times with 0.1% PBST for 15 min each. Alexa Fluor-conjugated secondary antibodies  
355 (Invitrogen, Molecular Probes) applied overnight at 1:200 dilutions in 0.2 % PBST included anti-  
356 rabbit (488 nm), anti-goat (555 nm), and anti-mouse (647 nm). Larvae were then washed four  
357 times in 0.2 % PBST for 15 min each and stored at 4 °C in VectaShield (Vector Laboratories).

358 For the immunofluorescence labeling of postsynaptic density in wholemounted wild-type  
359 control and *sema7a*<sup>-/-</sup> larvae, 2-4 dpf larvae were fixed with 4 % formaldehyde in PBS for  
360 4.5-6 hr at 4 °C. Larvae were washed five times with 0.01 % PBST for 5 min each and then  
361 rinsed in distilled water for 5 min. The larvae were permeabilized with ice-cold acetone at -20 °C  
362 for 5 min. They were rinsed in distilled water for 5 min, washed five times with 0.01 % PBST  
363 for 5 min each, and blocked overnight with PBS buffer containing 2 % goat serum and 1 %  
364 BSA. Murine anti-pan-MAGUK antibody (1:500; IgG1 NeuroMab, K28.86, 75-029) was diluted  
365 in PBS containing 1 % BSA, added to the larvae, and incubated for 3 hr at room temperature.  
366 Larvae were washed five times for 5 min each with 0.01 % PBST. Alexa Fluor 555-conjugated  
367 anti-mouse secondary antibody (1:1000) diluted in PBS containing 1 % BSA was added to the  
368 larvae and incubated for 2 hr at room temperature. Larvae were washed five times with 0.01 %  
369 PBST for 5 min each, rinsed in distilled water for 5 min, and stored at 4 °C in VectaShield  
370 (Vector Laboratories).

371 Posterior segments of fixed larvae were mounted on a glass slide and imaged with a  
372 microlens-based, super-resolution confocal microscope (VT-iSIM, VisiTech international)  
373 under 60X and 100X, silicone-oil objective lenses of numerical apertures 1.30 and 1.35,  
374 respectively. Images at successive focal depths were captured at 200 nm intervals and  
375 deconvolved with the Microvolution software in ImageJ.

376 **Measurement of Sema7A intensity.** The average Sema7A fluorescence intensities of the hair  
377 cells from 1.5 dpf, 2 dpf, 3 dpf, and 4 dpf neuromasts were measured by determining the mean  
378 gray level within each hair cell labeled by actin-GFP expression. The intensity distribution of  
379 Sema7A protein along the apicobasal axis of the hair cell was measured using the line profile  
380 tool in ImageJ (Fig. S1F). Because hair cell lengths differed among samples, lines were drawn  
381 with 2  $\mu\text{m}$  widths and varying lengths of 6-8  $\mu\text{m}$ . For each hair cell, apicobasal length was  
382 scaled from 0 to 100 arbitrary units and the intensity values from 0 to 1 arbitrary units.

383 **Generation of skeletonized networks.** The labeled sensory axons were traced in three  
384 dimensions with ImageJ's semi-automated framework, SNT (46). Each trace depicts the  
385 skeletonized form of the posterior lateral-line nerve, the posterior lateral-line branch, and the  
386 point of arborization from which the sensory arbors radiate to contact the hair cells (Fig. 2D,E).  
387 The three-dimensional pixels or voxels obtained from the skeletonized sensory arbor traces  
388 were processed using custom code written in Python for visual representation and quantitative  
389 analysis.

390 **Generation of combined hair cell clusters and the corresponding combined skeletonized**  
391 **networks.** The hair cell clusters of neuromasts from each developmental stage were aligned  
392 by the centers of their apices, which were identified by the hair bundles, and overlaid to  
393 generate combined hair cell clusters using custom Python code. The associated skeletonized  
394 sensory-arbor traces at each developmental stage were aligned similarly using custom Python  
395 code. The details of the procedures are available upon request and the corresponding code is  
396 available on GitHub.

397 **Quantification of sensory arbor distributions around hair cell clusters.** The region from  
398 the center of the combined hair cell cluster to 60  $\mu\text{m}$  in the post-cluster region was divided into  
399 3600 concentric sections of equal area (Fig. S5A). Each section, as depicted with a distinct  
400 color shade, had an area of  $\pi \mu\text{m}^2$ . Sensory arbor density was defined as  $\text{Log}_{10}[(\text{Area occupied}$   
401  $\text{by the arbors in each section}) / (\text{Area of each section})]$ . The arbor density was then plotted as  
402 a histogram against distance from the center of the combined hair cell cluster. Each bin of the  
403 histogram represents an area of  $\pi \mu\text{m}^2$ . The histograms were finally represented as density  
404 trace graphs with Kernel Density Estimation (KDE) in Python.

405 **Quantification of contact between sensory arbors and hair cell clusters.** For each hair cell  
406 cluster, the voxels of the sensory arbor traces that were inside or within 0.5  $\mu\text{m}$ —the average  
407 neurite radius—of the cluster boundary were denoted as arbors in contact with their  
408 corresponding hair cell cluster (Fig. S5B). The percentage of arbors in contact with each hair  
409 cell cluster was defined as:  $(\text{Number of voxels that remained inside the cluster boundary} / \text{Total}$   
410  $\text{number of voxels in the arbor}) \times 100$ . The data were analyzed through an automated pipeline  
411 with custom code.

412 **Quantification of aberrant sensory arborization in ectopic Sema7A<sup>sec</sup> expression.** The  
413 sensory arbor networks were traced in three dimensions with SNT. The surface of each of the  
414 ectopically expressing Sema7A<sup>sec</sup>-mKate2 cells was represented by a single point that was  
415 closest to the terminal point of the guided neurite. Distances between two points were  
416 calculated using standard mathematical operations.

417 **Statistical analysis.** Data visualization and statistical analysis were conducted with GraphPad  
418 Prism (Version 9). The Mann-Whitney test was used for hypothesis testing, and the statistical  
419 details are given in the respective figure legends.

420 **Data and code availability.** Owing to size restrictions, the experimental image data have not  
421 been uploaded to a repository but are available from the corresponding author on request. The

422 code generated during this study is available on GitHub  
423 ([https://github.com/agnikdasgupta/Sema7A\\_regulates\\_neural\\_circuitry](https://github.com/agnikdasgupta/Sema7A_regulates_neural_circuitry)).

424 **Acknowledgments.** The authors thank Adrian Jacobo, Caleb Reagor, and Nicolas Velez for  
425 valuable discussions and data processing. Samantha Campbell and Anna Kaczynska provided  
426 expert fish husbandry. Katie Kindt kindly provided various strains of zebrafish. Image  
427 processing benefitted from facilities at the Bio-Imaging Resource Center. A.D. was supported  
428 by a Kavli Neural Systems Institute Postdoctoral Fellowship from Rockefeller University. S.P.P.  
429 and L.M.S. were supported by Howard Hughes Medical Institute, of which A.J.H. is an  
430 Investigator.

#### 431 **Author Contributions**

432 A.D. initiated the project, conducted experiments, and quantified results. S.P.P. developed the  
433 Python codes for image analysis and quantified results. L.M.S. conducted preliminary  
434 experiments. A.D. wrote the paper with contributions from A.J.H.

#### 435 **Declaration of Interests**

436 The authors declare no competing interests.

437

438 **Figure Legends**

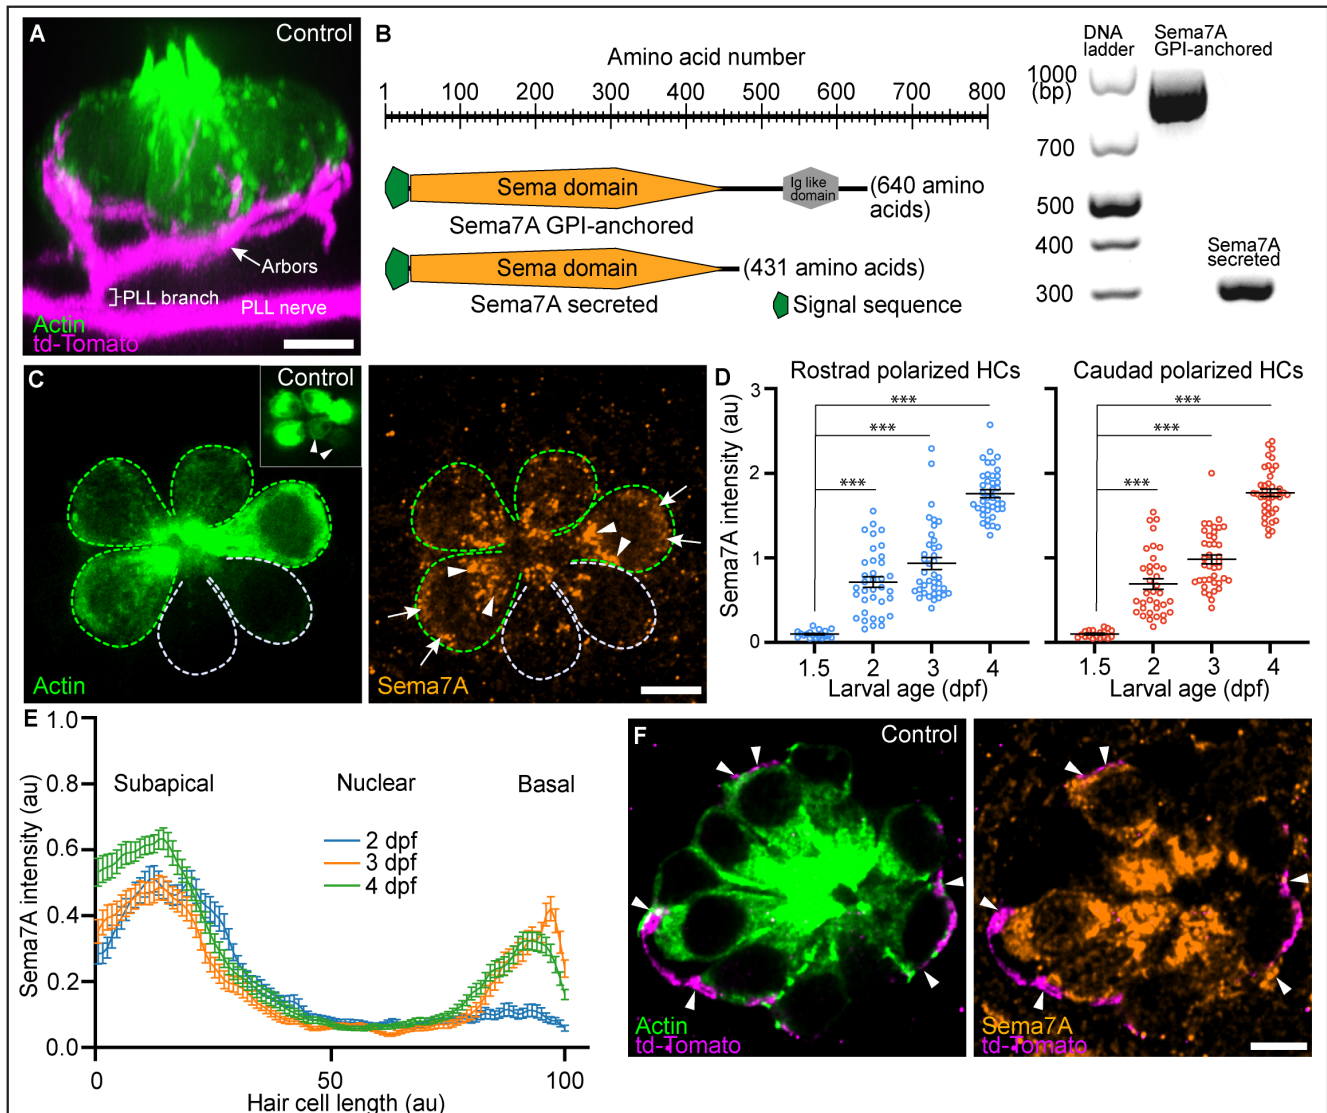

439  
440

441 **Figure 1. Expression of Semaphorin7A in the zebrafish's lateral line.** (A) A volumetric  
442 rendering of a PLL neuromast depicts the sensory axons (magenta) that branch from the lateral  
443 line nerve to arborize around the basolateral surface of the hair cell cluster (green). Additional  
444 cell types in the neuromast are not labeled. Larval age, 3 dpf. (B) A schematic drawing of the  
445 two variants of the Sema7A protein molecule depicts the full-length GPI-anchored form and the  
446 smaller, potentially secreted form. Both the molecules include a signal sequence (green) and  
447 a conserved sema domain (orange). Gel-based RT-PCR analysis indicates the presence of

448 both the variants in developing larva. (C) A surface micrograph of a neuromast at 3 dpf depicts  
449 two pairs of mature hair cells (green dashed lines) and a pair of immature hair cells (grey  
450 dashed lines). Inset: among the three pairs of hair cell apices, the immature pair is indicated  
451 by arrowheads. Immunolabeling reveals that the Sema7A protein (orange) occurs consistently  
452 at the subapical region (arrowheads) and at the basolateral surface (arrows) of a hair cell. In  
453 this and in each of the subsequent neuromast images, anterior is to the left and ventral to the  
454 top. (D) A plot quantifies developmental changes in the average Sema7A intensity in both  
455 rostrally and caudally polarized hair cells of neuromasts from 1.5 dpf to 4 dpf. The data stem  
456 from 18, 36, 39, and 40 hair cells in neuromasts of respectively 1.5 dpf, 2 dpf, 3 dpf, and 4 dpf  
457 larvae. (E) A plot quantifies the distribution of average Sema7A intensity along the hair cell's  
458 apicobasal axis. The results stem from 52, 57, and 54 hair cells of neuromasts from 2 dpf,  
459 3 dpf, and 4 dpf larvae. (F) An immunofluorescence image at the nuclear level of a 4 dpf  
460 neuromast shows the contact of the sensory arbors (magenta) with the basolateral surface of  
461 the hair cells (green). Immunolabeling for Sema7A (orange) reveals enrichment of the protein  
462 at the hair cell bases and sensory-axon interfaces (arrowheads). HC, hair cell; Scale bars,  
463 5  $\mu\text{m}$ ; au, arbitrary unit; means  $\pm$  SEMs; \*\*\* implies  $p < 0.001$ .  
464



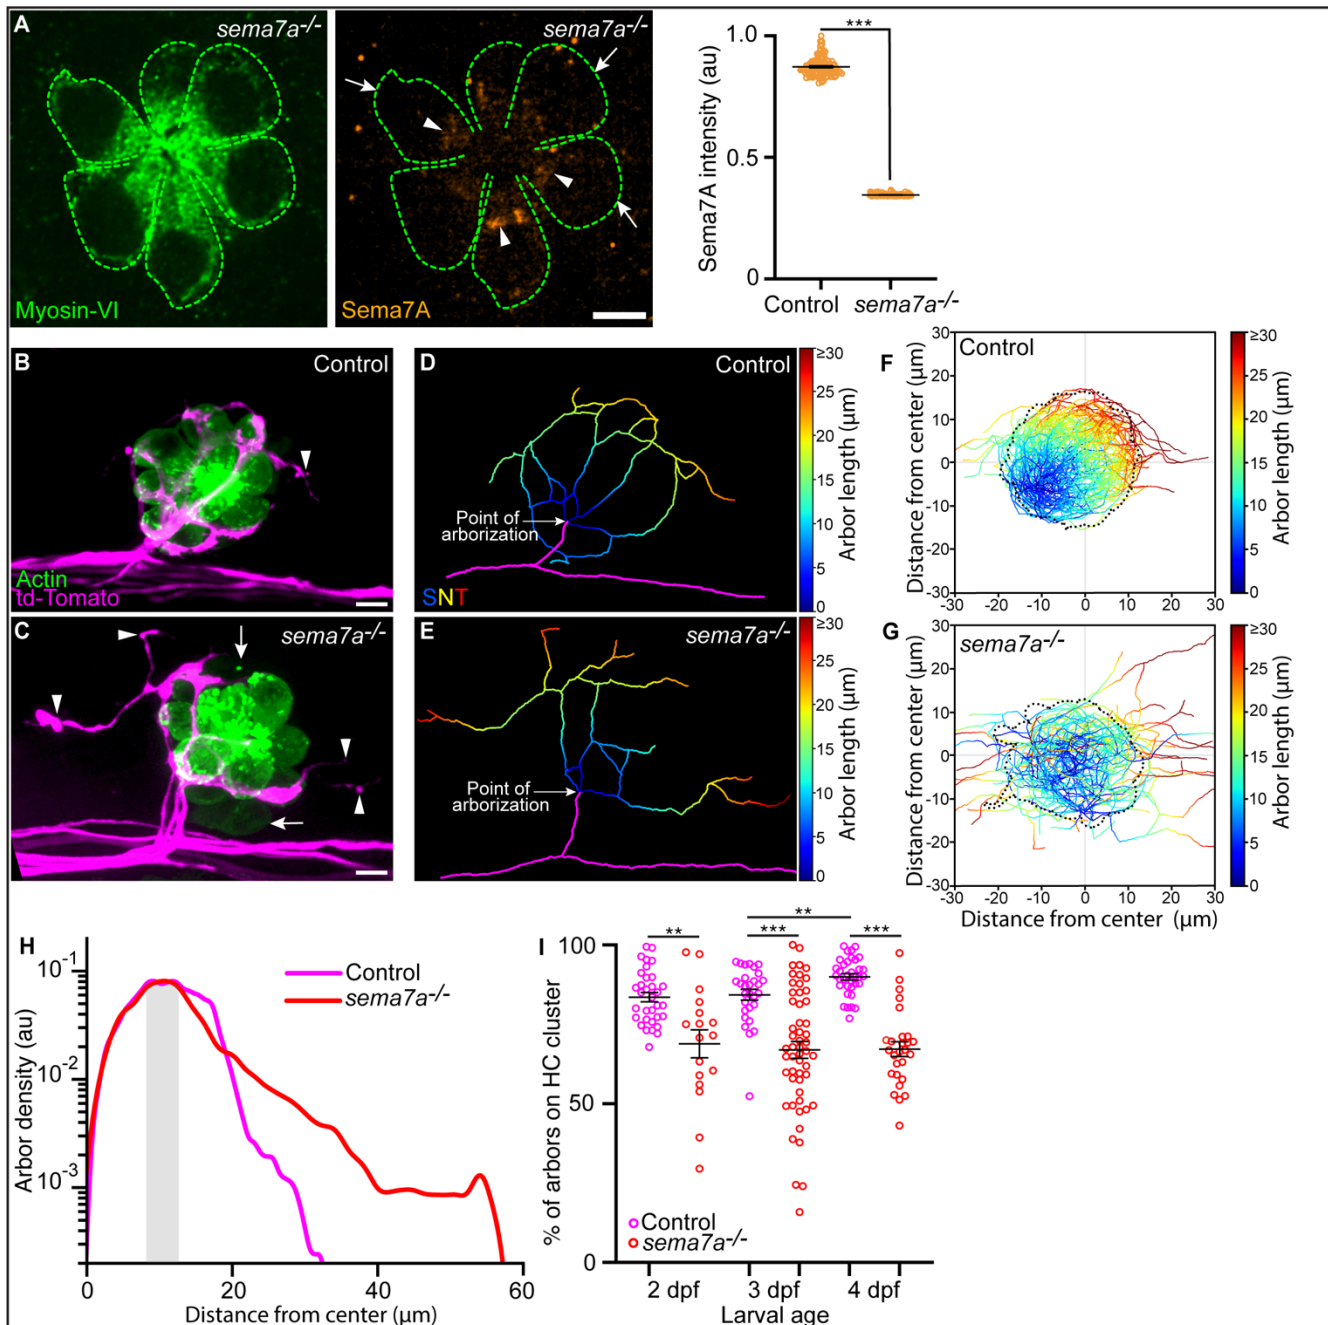

465 **Figure 2. *sema7a<sup>-/-</sup>* mutants display aberrant sensory axon arborizations.** (A) In a  
 466 micrograph of a 3 dpf *sema7a<sup>-/-</sup>* neuromast, Myosin VI (green) marks the hair cells (green  
 467 dashed lines) in which the level of Sema7A (orange) is highly reduced, with sporadic  
 468 localization in the subapical region (arrowheads) and none in the basolateral (arrow) region. A  
 469 plot of normalized Sema7A intensity from 99 control and 100 *sema7a<sup>-/-</sup>* hair cells quantitates



470 the effect. (B,C) Surface views of a control and a *sema7a*<sup>-/-</sup> neuromast at 4 dpf depict the  
471 interaction of the sensory arbors (magenta) with hair cell clusters (green). In the control, the  
472 arbors intimately contact the hair cells, with a few exceptions (arrowhead). In the *sema7a*<sup>-/-</sup>  
473 mutant, the arbors direct many aberrant projections (arrowheads) away from the hair cell  
474 cluster. The two immature hair cell pairs in the *sema7a*<sup>-/-</sup> neuromast are indicated by arrows.  
475 (D,E) Skeletonized networks portray the three-dimensional topology of the sensory arbors from  
476 the control and the *sema7a*<sup>-/-</sup> neuromasts depicted in panels B and C. The pseudocolored  
477 trajectories depict the increase in arbor contour length from each point of arborization, defined  
478 as the point at which the lateral line branch (magenta) contacts hair cell cluster.  
479 (F,G) Micrographs depict the skeletonized networks of the combined 4 dpf hair cell clusters,  
480 whose centers are located at (0,0). The X- and Y-coordinates represent the anteroposterior  
481 (AP) and the dorsoventral (DV) axes of the larva, respectively. Positive values of the X- and  
482 Y-coordinates represent the posterior and ventral directions, respectively. Combined  
483 skeletonized network traces from 27 control and 27 *sema7a*<sup>-/-</sup> mutant neuromasts are  
484 represented. H) The plot denotes the densities of the sensory arbors around the center of the  
485 combined hair cell clusters for 35 control (magenta) and 27 *sema7a*<sup>-/-</sup> (red) neuromasts at 4 dpf.  
486 The shaded area marks the region proximal to the boundary of the combined hair cell cluster.  
487 (I) The plot quantifies the degree of contact of the sensory arbors to their hair cell clusters in  
488 individual neuromasts from both control (magenta) and *sema7a*<sup>-/-</sup> mutants (red), each point  
489 represents a single neuromast. Thirty-three, 29, and 35 neuromasts were analyzed from 2 dpf,  
490 3 dpf, and 4 dpf control larvae, respectively. Seventeen, 53, and 27 neuromasts were analyzed  
491 from 2 dpf, 3 dpf, and 4 dpf *sema7a*<sup>-/-</sup> mutant larvae, respectively. HC, hair cell; Scale bars,  
492 5  $\mu\text{m}$ ; au, arbitrary unit; means  $\pm$  SEMs; \*\*\* implies  $p < 0.001$ ; \*\* signifies  $p < 0.01$ .  
493

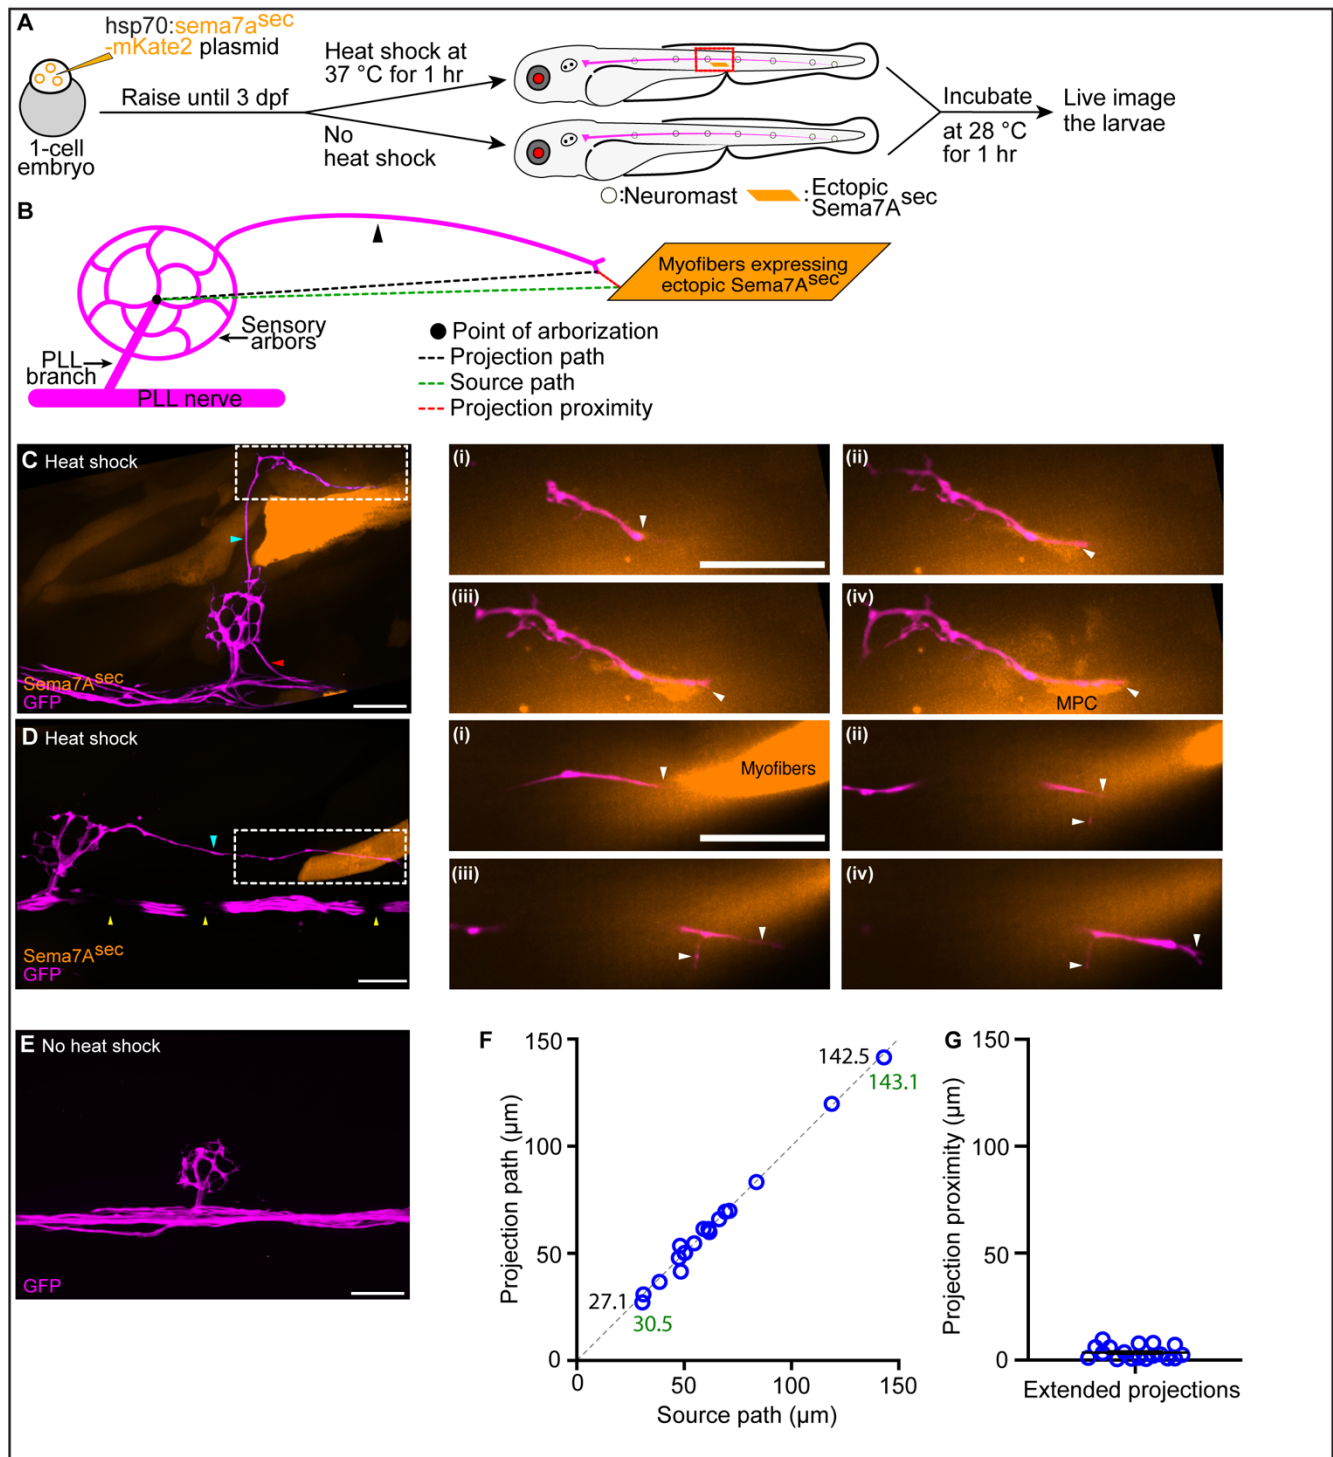

494 **Figure 3. Ectopic *Sema7A<sup>sec</sup>* diffusive cue provides neural guidance *in vivo*.** (A) A  
 495 diagrammatic overview depicts the generation of a transgenic animal that expresses the  
 496 *Sema7A<sup>sec</sup>* protein ectopically under the control of a thermally inducible promoter. Larvae with

497 ectopic myotomal-integration near the network of sensory arbors (red line) were imaged to  
498 analyze arbor morphology. (B) A schematic drawing of a sensory arbor from a heat-shocked  
499 larva depicts an extended axonal projection (arrowhead) that reaches toward the myofibers  
500 expressing the ectopic Sema7A<sup>sec</sup> protein. Parameters that quantitate the accuracy of the  
501 extended axonal projections toward the ectopic Sema7A<sup>sec</sup> sources are denoted. (C) In a  
502 micrograph of an ectopically expressing Sema7A<sup>sec</sup> (orange) larva, the sensory arbor  
503 (magenta) extends two aberrant axonal projections. One elongates (cyan arrowhead) along  
504 the somite boundary to reach and contact an ectopically integrated muscle progenitor cell  
505 (white dashed line) and the other (red arrowhead) reenters the posterior lateral line nerve while  
506 following a second ectopic source. The through-focus scan (i–iv) from the epidermis to the  
507 dermomyotome reveals the intimate contact between the aberrant sensory arbor (arrowheads)  
508 and the muscle progenitor cell. MPC, muscle progenitor cell. (D) In a micrograph of an  
509 ectopically expressing Sema7A<sup>sec</sup> (orange) larva, the sensory arbor (magenta) extends a single  
510 aberrant axonal process (cyan arrowhead) to reach ectopically integrated myofibers (white  
511 dashed line). The through-focus scan (i–iv) from the epidermis to the deep myotome reveals  
512 the proximal association of the aberrant sensory arbor (arrowheads) to the myofibers.  
513 Melanocytes (yellow arrowhead) along the horizontal myoseptum intermittently block the  
514 visibility of the lateral line nerve. (E) An injected, but not heat-shocked, control larva does not  
515 express ectopic Sema7A<sup>sec</sup> and does not show aberrant projection from the sensory arbor.  
516 (F) A plot demonstrates the accuracy of 18 extended axonal arbors in finding ectopic  
517 Sema7A<sup>sec</sup> sources. Each circle represents a single ectopic integration event. The two pairs of  
518 numbers represent the minimal and maximal lengths of the projection path (black) and its  
519 corresponding source path (green). (G) A plot quantitates the distribution of projection-  
520 proximity length from 18 ectopic integration events. Scale bars, 20  $\mu\text{m}$ ; means  $\pm$  SEMs.  
521

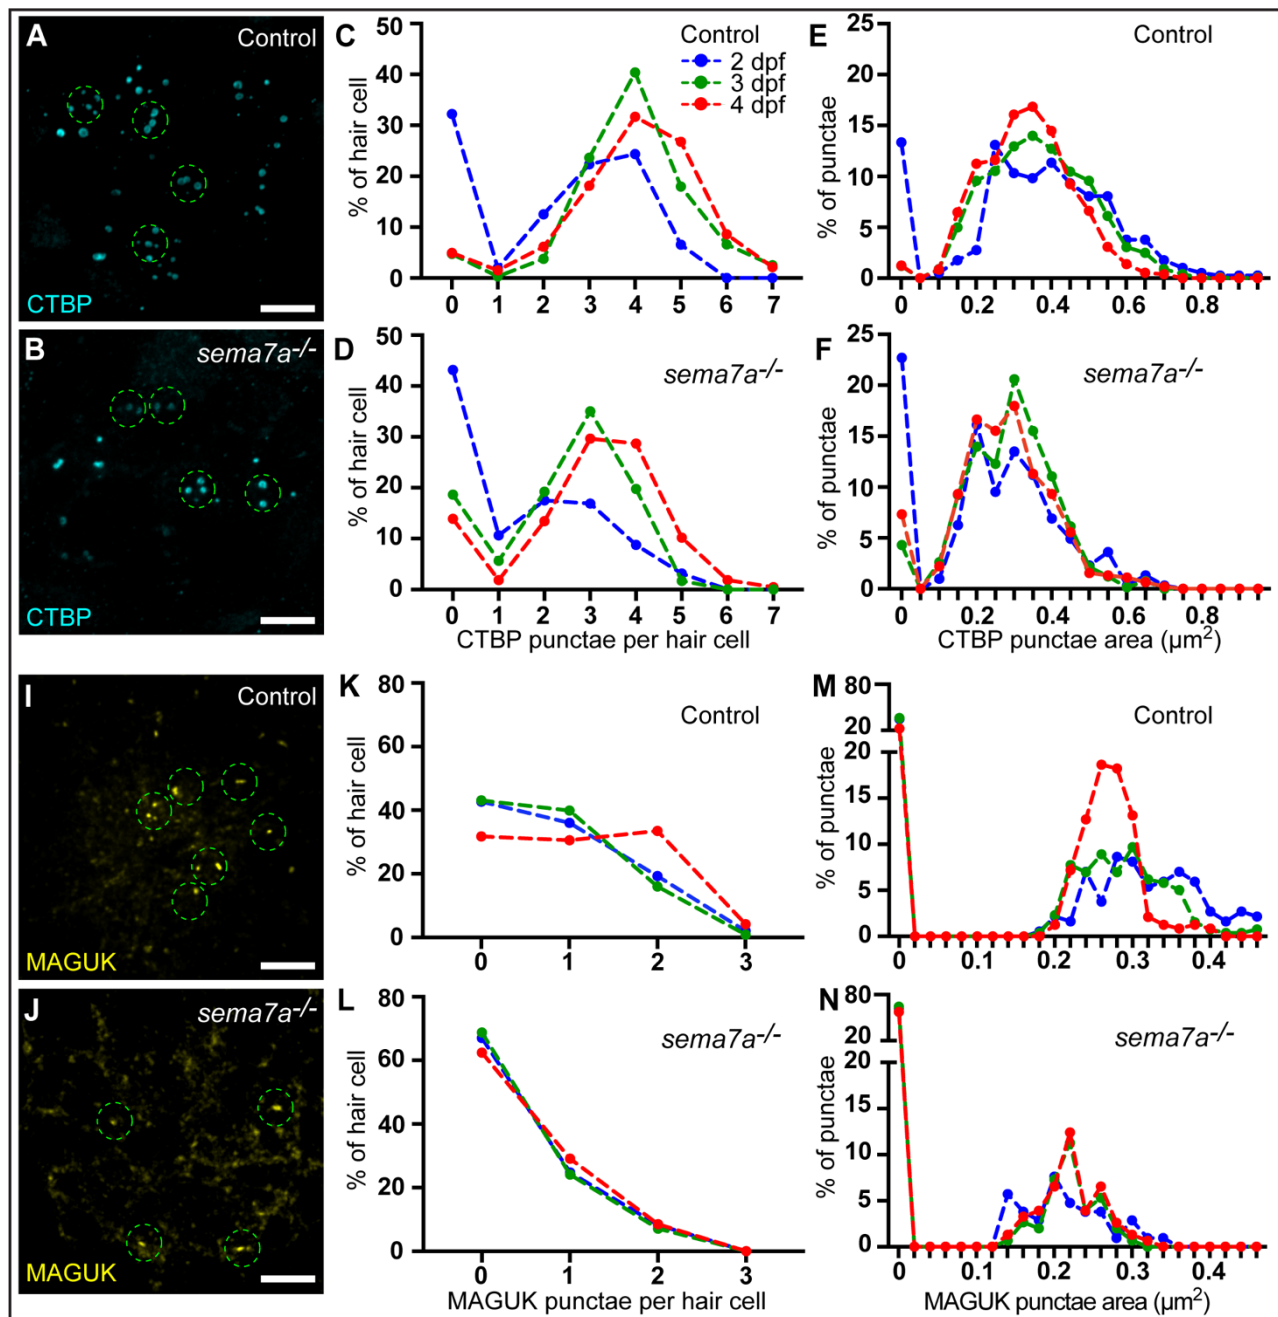

522 **Figure 4. Sema7a deficiency impairs synaptic assembly.** (A,B) Maximal-intensity  
523 projections of micrographs from a control and a *sema7a*<sup>-/-</sup> neuromast depict the presynaptic  
524 aggregates marked by CTBP (cyan). The approximate hair cell basal region is outlined by  
525 dashed green circles. (C-F) Plots quantitate the numbers of presynaptic aggregates (C,D) and  
526 their areas (E,F), in each hair cell across developmental stages. One hundred and fifty-two,

527 317, and 325 hair cells were analyzed from 2 dpf, 3 dpf, and 4 dpf control larvae, respectively.  
528 One hundred and sixty, 216, and 177 hair cells were analyzed from 2 dpf, 3 dpf, and 4 dpf  
529 *sema7a*<sup>-/-</sup> mutant larvae, respectively. (I,J) Maximal-intensity projections from micrographs of  
530 a control and a *sema7a*<sup>-/-</sup> neuromast depict the postsynaptic aggregates marked by MAGUK  
531 (yellow). The approximate hair cell basal region is outlined by dashed green circles. (K,N) Plots  
532 quantitate the numbers of postsynaptic aggregate (K,L) and their areas (M,N), in each hair cell  
533 across developmental stages. One hundred and fifty, 218, and 167 hair cells were analyzed  
534 from 2 dpf, 3 dpf, and 4 dpf control larvae, respectively. Ninety-seven, 141, and 141 hair cells  
535 were analyzed from 2 dpf, 3 dpf, and 4 dpf *sema7a*<sup>-/-</sup> mutant larvae, respectively. Scale bars,  
536 5  $\mu\text{m}$ .  
537



538 **Supplementary Figure Legends**

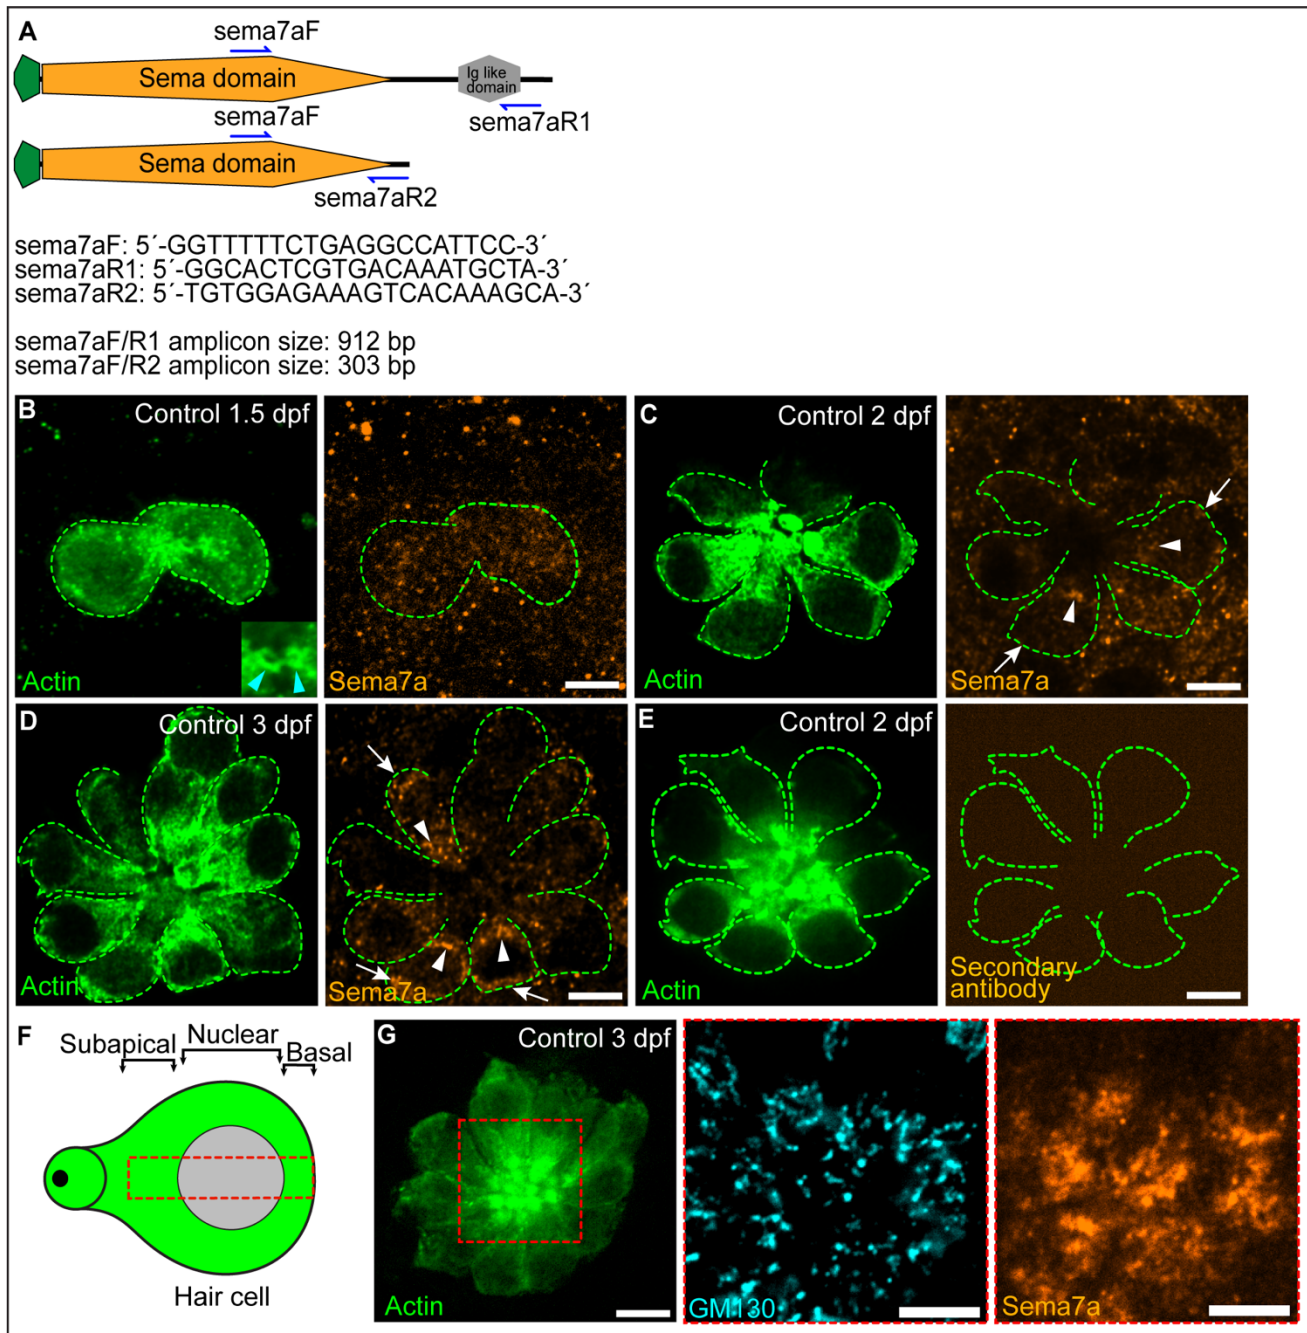

539 **Supplementary Figure 1. Expression of Semaphorin7A in the lateral line neuromast.**

540 (A) Distinct sets of primers (arrows) identify the two variants of the Sema7A protein molecule.

541 (B-D) Surface micrographs show hair cells marked with actin-GFP (green dashed lines) and

542 the localization of Sema7A protein (orange) in the subapical (arrowheads) and basal regions

543 (arrows) of the corresponding hair cells from neuromasts of developing control larvae. The  
544 inset in panel B depicts the apices of the immature hair cell pair. (E) Immunolabeling with only  
545 the secondary antibody fails to detect any Sema7A signal. (F) A schematic diagram of a single  
546 hair cell depicts the three distinct regions along the apicobasal axis of the cell. Sema7A  
547 intensity was measured along this apicobasal axis (red dashed line). (G). A surface micrograph  
548 depicts hair cells (green, left) whose subapical region (red dashed line) harbors the Golgi  
549 network (cyan, middle) where the Sema7A protein is enriched (orange, right). Scale bars, 5  $\mu\text{m}$ .

550

551 **Supplementary Movie 1. Sema7A is enriched at the hair cell base and sensory-axon**  
552 **interface.** A through-focus scan of a 4 dpf control neuromast depicts the hair cells (green) that  
553 are innervated by the sensory axons (magenta) at their basolateral surfaces where the Sema7A  
554 protein (orange) is highly enriched. Scale bar, 5  $\mu\text{m}$ .

555

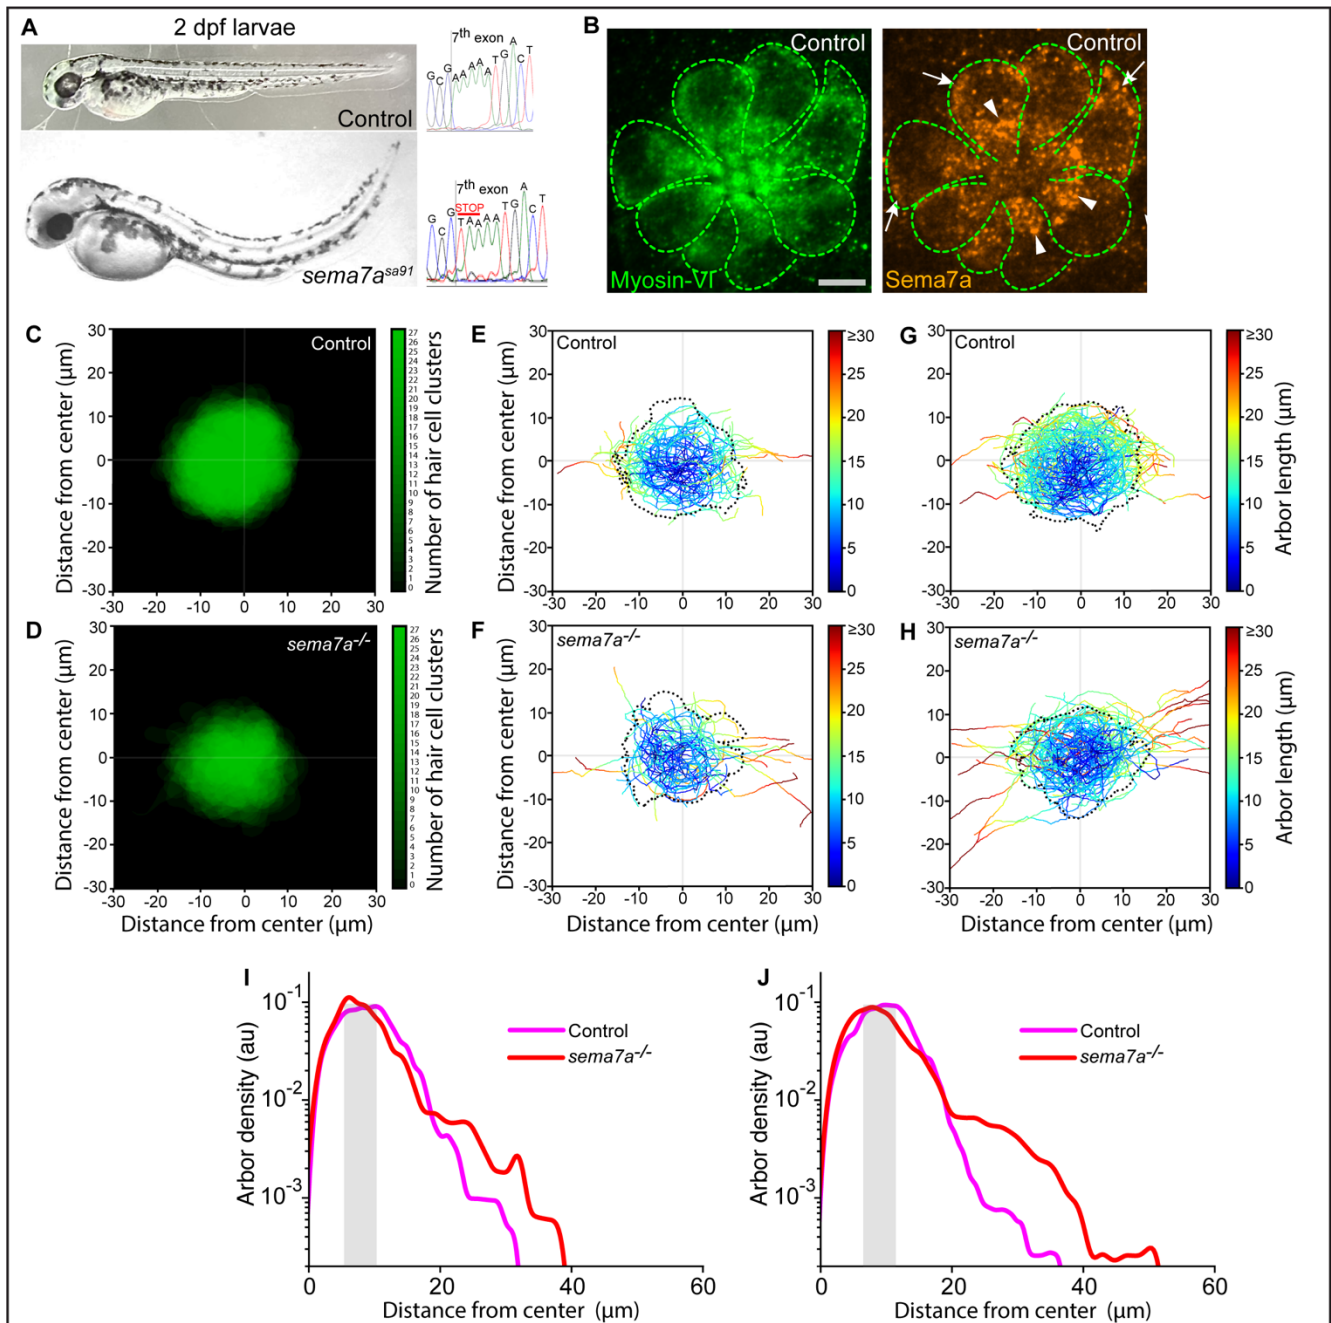

556

557 **Supplementary Figure 2. *sema7a*<sup>-/-</sup> mutants exhibit aberrant sensory-axon arborization**

558 **throughout development.** (A) Micrographs depict the overall morphologies and *sema7a*

559 genomic profiles of 2 dpf control (top) and *sema7a*<sup>-/-</sup> larvae (bottom). (B) In a surface

560 micrograph of a 3 dpf control neuromast, myosin VI (green) marks hair cells (green dashed

561 lines). Sema7A (orange) protein is highly enriched in the subapical region (arrowheads) and

562 basolateral (arrow) region of the hair cells. (C,D) Micrographs depict combined 4 dpf hair cell

563 clusters, each of whose centers arise located at (0,0). The X- and Y-coordinates represent the

564 anteroposterior (AP) and dorsoventral (DV) axes of the larva, respectively. Positive values of



565 the X- and Y-coordinates represent posterior and ventral directions, respectively. Combined  
566 hair cell clusters from 27 control and 27 *sema7a*<sup>-/-</sup> mutant neuromasts are represented.  
567 (E,F) Micrographs depict the skeletonized networks of the combined 2 dpf hair cell clusters  
568 from 17 control and 17 *sema7a*<sup>-/-</sup> mutant neuromasts. (G,H) Micrographs depict the  
569 skeletonized networks of the combined 3 dpf hair cell clusters from 29 control and 29  
570 *sema7a*<sup>-/-</sup> mutant neuromasts. (I) A plot quantitates the densities of the sensory arbors around  
571 the center of the combined hair cell clusters for 33 control (magenta) and 17 *sema7a*<sup>-/-</sup> (red)  
572 neuromasts at 2 dpf. The shaded area marks the region proximal to the boundary of the  
573 combined hair cell cluster. (J) A plot quantitates the densities of the sensory arbors around the  
574 center of the combined hair cell clusters for 29 control (magenta) and 53 *sema7a*<sup>-/-</sup> (red)  
575 neuromasts at 3 dpf. The shaded area marks the region proximal to the boundary of the  
576 combined hair cell cluster. Scale bar, 5  $\mu$ m; au, arbitrary units.

577

578 **Supplementary Movie 2. Three-dimensional arborization patterns in control and**  
579 ***sema7a*<sup>-/-</sup> neuromasts.** Lateral views depict three-dimensionally rendered combined  
580 skeletonized network traces from 27 control and 27 *sema7a*<sup>-/-</sup> mutant neuromasts.  
581

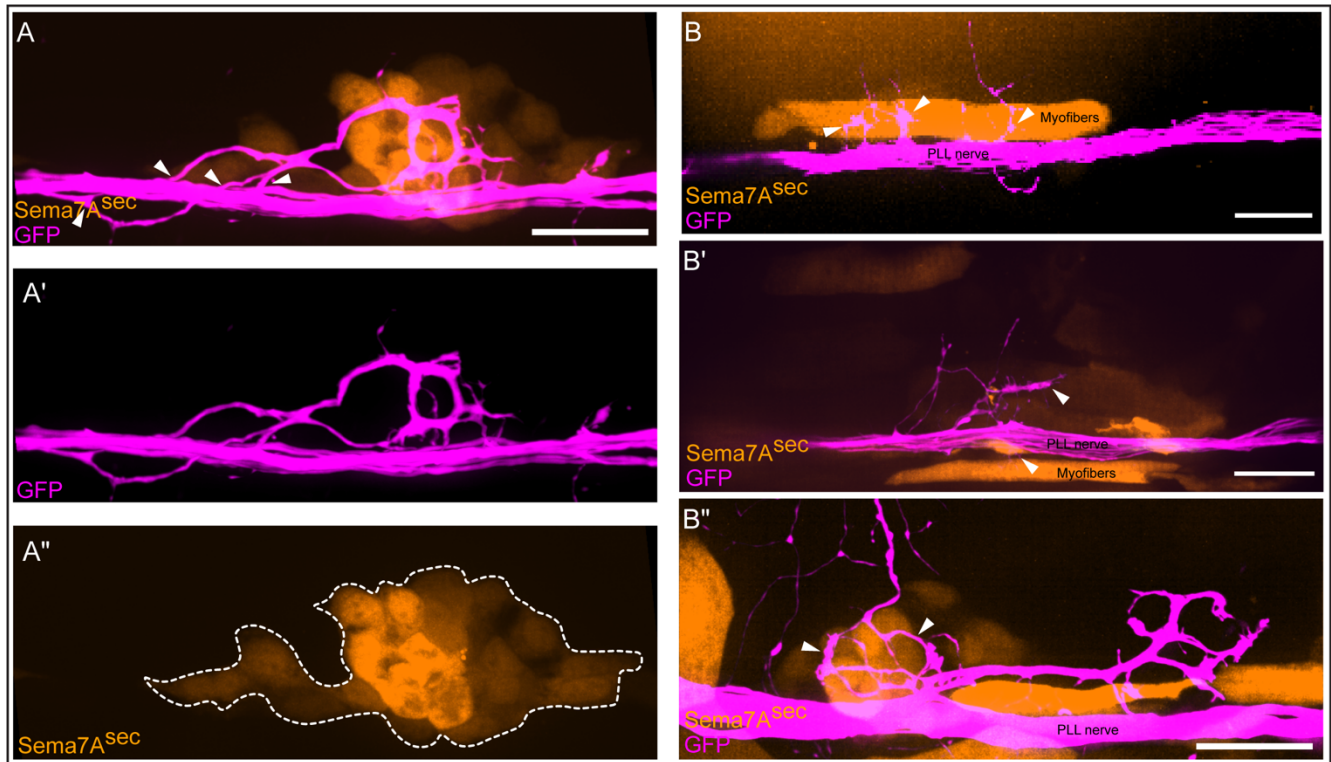

582

583

584

585

586

587

588

589

590

591

592

**Supplementary Figure 3. Ectopic Sema7A<sup>sec</sup> diffusive cues induce aberrant neural arborizations.** (A-A'') In a micrograph of an ectopically expressing Sema7A<sup>sec</sup> (orange) larva, the sensory arbors (magenta) extend multiple aberrant axonal projections (arrowheads) that reenter the lateral line nerve while following an ectopic Sema7A source. Maximal-intensity projections of the sensory arbors and the ectopically expressing Sema7A cells (white dashed line) are shown in A' and A'', respectively. (B-B'') Micrographs depict three individual incidents of ectopic *sema7a<sup>sec</sup>* (orange) integrations that occurred distant from neuromasts. In each case, a set of myofibers expresses the ectopic Sema7A<sup>sec</sup> protein that induces neurite extensions (arrowheads) from the lateral line nerve (magenta) toward itself. Scale bars, 20  $\mu$ m.

593 **Supplementary Movie 3. Sensory axonal projections contact an embryonic muscle**  
594 **progenitor cell expressing *Sema7A<sup>sec</sup>*.** A through-focus scan of a 3 dpf larva depicts a  
595 muscle progenitor cell in the dermomyotome that expresses the ectopic *Sema7A<sup>sec</sup>* (orange)  
596 and the sensory axonal projection (magenta) that makes intimate contact with it.

597  
598 **Supplementary Movie 4. Volumetric surface reconstruction of a sensory arbor and an**  
599 **embryonic muscle progenitor expressing *Sema7A<sup>sec</sup>*.** Reconstruction of the muscle  
600 progenitor cell (orange) at 3 dpf reveals its intimate association with an attracted sensory arbor  
601 (magenta).

602  
603 **Supplementary Movie 5. Sensory axonal projections remain in proximity to myofibers**  
604 **expressing *Sema7A<sup>sec</sup>*.** A through-focus scan of a 3 dpf larva depicts mature myofibers  
605 expressing exogenous *Sema7A<sup>sec</sup>* deep in the myotome (orange) and the sensory axonal  
606 projection (magenta) that remains nearby.

607  
608 **Supplementary Movie 6. Volumetric surface reconstruction of a sensory arbor and the**  
609 **mature myofibers expressing *Sema7A<sup>sec</sup>*.** Reconstruction of mature myofibers expressing  
610 ectopic *Sema7A<sup>sec</sup>* (orange) at 3 dpf shows their close association with the attracted sensory  
611 arbors (magenta).

612  
613 **Supplementary Movie 7. Aberrant axonal projections reenter the lateral line nerve while**  
614 **following an ectopic *Sema7A<sup>sec</sup>* source.** A through-focus scan of a 3 dpf larva depicts cells  
615 expressing exogenous *Sema7A<sup>sec</sup>* (orange) that guides the aberrant sensory axonal projection  
616 (magenta) back into the lateral line nerve. Scale bar, 20  $\mu\text{m}$ .

617

618 **Supplementary Movie 8, 9, and 10. Ectopic Sema7A<sup>sec</sup> expression induces aberrant**  
619 **neurite projections from the lateral line nerve.** Through-focus scans of 3 dpf larvae depict  
620 three individual incidents of ectopic *sema7a<sup>sec</sup>* (orange) integrations that occurred distant from  
621 the neuromasts. In each case, myofibers express ectopic Sema7A<sup>sec</sup> protein that attracts  
622 neurite extensions (arrowheads) from the lateral line nerve (magenta). Scale bars, 20  $\mu\text{m}$ .  
623

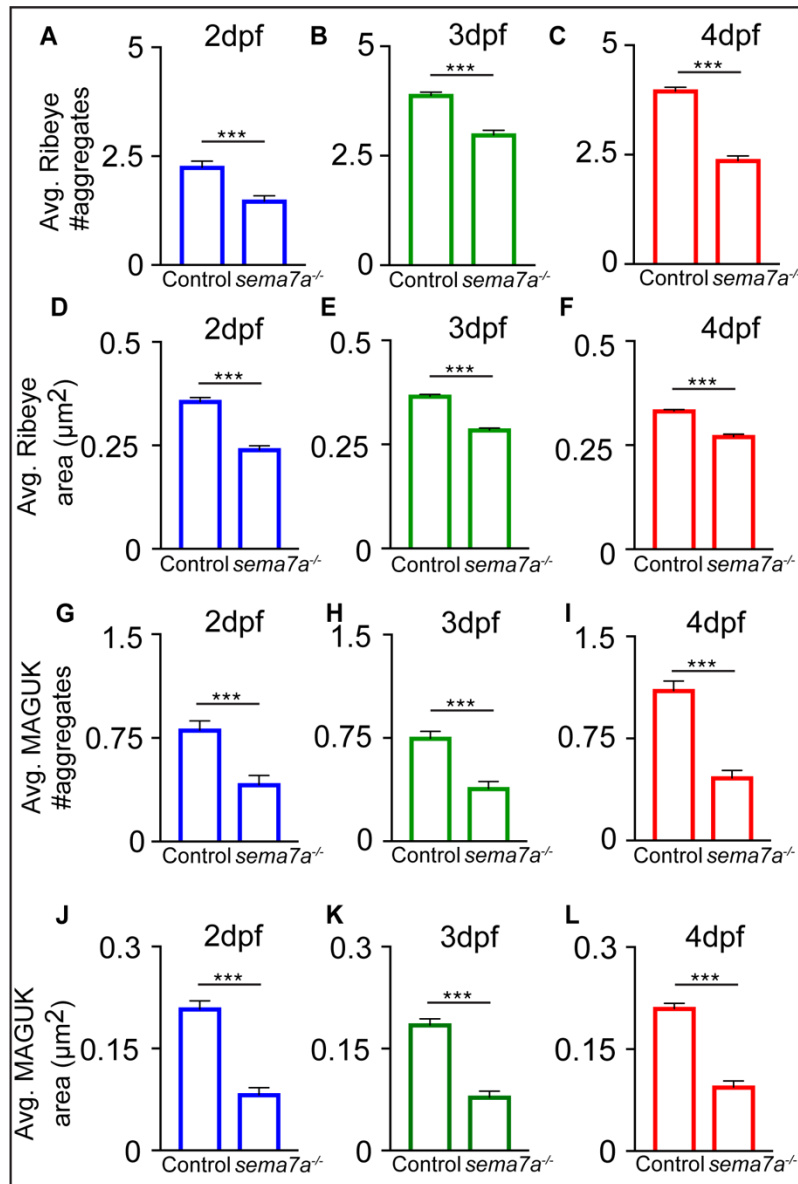

624

625 **Supplementary Figure 4. *sema7a*<sup>-/-</sup> mutants display impaired synaptic assembly.**

626 (A-F) The plots quantitate the average numbers and areas of presynaptic aggregates from  
627 control and *sema7a*<sup>-/-</sup> neuromasts. Significant decreases in the numbers and areas of  
628 presynaptic aggregates are observed across development. Three hundred and forty-one, 1229,  
629 and 1286 presynaptic aggregates were analyzed from 2 dpf, 3 dpf, and 4 dpf control larvae,  
630 respectively. Two hundred and thirty-five, 643, and 419 presynaptic aggregates were analyzed  
631 from 2 dpf, 3 dpf, and 4 dpf *sema7a*<sup>-/-</sup> mutant larvae, respectively. (G-L) The plots quantitate  
632 the average numbers and areas of postsynaptic aggregates from control and *sema7a*<sup>-/-</sup>  
633 neuromasts. Significant decreases in the numbers and areas of postsynaptic aggregates  
634 occurred during development. Three hundred and ninety-seven, 1243, and 1300 postsynaptic

635 aggregates were analyzed from 2 dpf, 3 dpf, and 4 dpf control larvae, respectively. Three  
636 hundred and four, 651, and 451 postsynaptic aggregates were analyzed from 2 dpf, 3 dpf, and  
637 4 dpf *sema7a*<sup>-/-</sup> mutant larvae, respectively. Means  $\pm$  SEMs; \*\*\* implies  $p < 0.001$ .

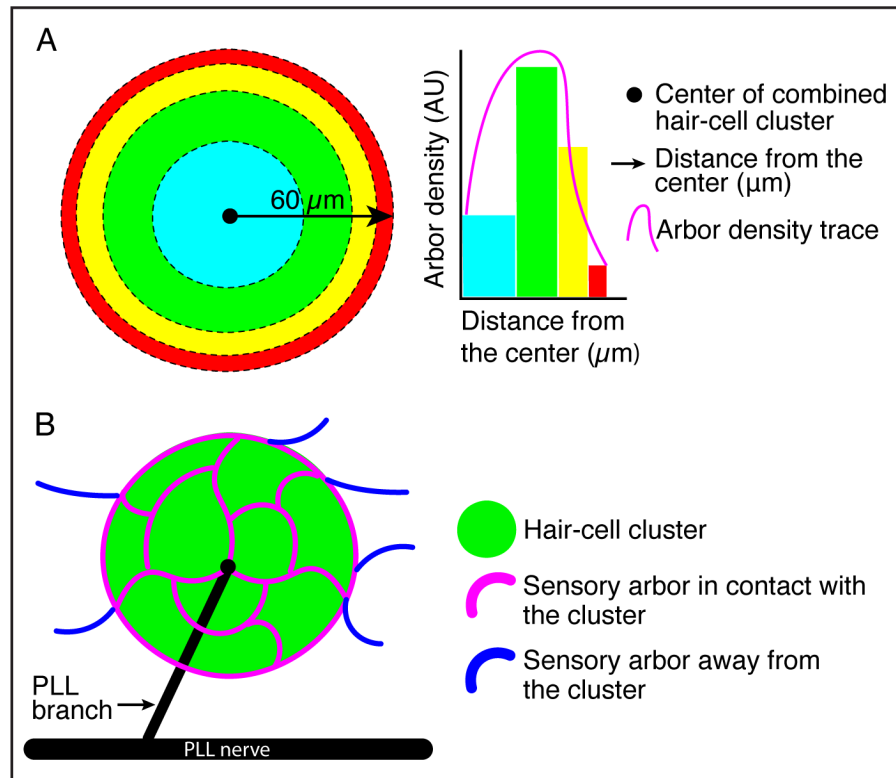

638

639 **Supplementary Figure 5. Quantification of sensory arbor distributions and contacts with**  
640 **hair cell clusters.** (A) A schematic drawing of the combined hair cell cluster and surrounding  
641 region depicts concentric sections of equal area in distinct colors (cyan, green, yellow, and  
642 blue). The arbor density is plotted as a histogram against the distance (black arrow) from the  
643 center (black circle) of the combined hair cell cluster. The histogram is represented as a density  
644 trace graph (magenta). (B) A schematic drawing of a posterior lateral line neuromast depicts  
645 the posterior lateral line (PLL) nerve (black), posterior lateral line branch (black), the sensory  
646 arbors (magenta) that contact the hair cell cluster (green), and the sensory arbors that project  
647 away (blue) from the hair cell cluster.

648

649

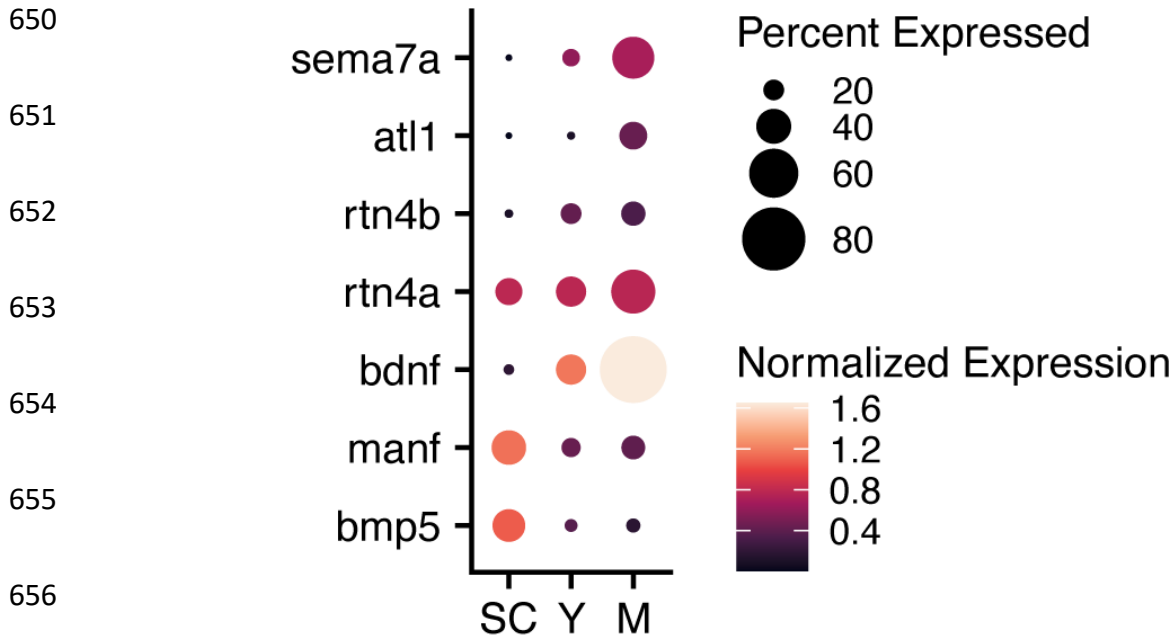

657

658 **Supplementary Figure 6. Expression of diverse neural guidance cues in developing**  
659 **neuromasts.** Analysis of single cell RNA-sequencing data (9) shows the expression of multiple  
660 neural guidance genes that are expressed across young hair cells (Y), mature hair cells (M),  
661 and support cells (SC). Dot sizes and colors signify the proportion of cells in each cluster that  
662 express a gene and the average strength of expression ( $\ln[(\text{counts}/10,000) + 1]$ ), respectively.  
663

- 664 1. Lykissas M, Batistatou A, Charalabopoulos K, Beris A. The Role of Neurotrophins in  
665 Axonal Growth, Guidance, and Regeneration. *Curr Neurovasc Res*. 2007 May 1;4(2):143–  
666 51.
- 667 2. Vaccaro G, Dumoulin A, Zuñiga NR, Bandtlow CE, Stoeckli ET. The Nogo-66 Receptors  
668 NgR1 and NgR3 Are Required for Commissural Axon Pathfinding. *J Neurosci*. 2022 May  
669 18;42(20):4087–100.
- 670 3. Nguyen-Ba-Charvet KT, Di Meglio T, Fouquet C, Chedotal A. Robos and Slits Control the  
671 Pathfinding and Targeting of Mouse Olfactory Sensory Axons. *J Neurosci*. 2008 Apr  
672 16;28(16):4244–9.
- 673 4. Jeroen Pasterkamp R, Peschon JJ, Spriggs MK, Kolodkin AL. Semaphorin 7A promotes  
674 axon outgrowth through integrins and MAPKs. *Nature*. 2003 Jul;424(6947):398–405.
- 675 5. Nagiel A, Andor-Ardo D, Hudspeth AJ. Specificity of Afferent Synapses onto Plane-  
676 Polarized Hair Cells in the Posterior Lateral Line of the Zebrafish. *J Neurosci*. 2008 Aug  
677 20;28(34):8442–53.
- 678 6. Jacobo A, Dasgupta A, Erzberger A, Siletti K, Hudspeth AJ. Notch-Mediated  
679 Determination of Hair-Bundle Polarity in Mechanosensory Hair Cells of the Zebrafish  
680 Lateral Line. *Curr Biol*. 2019 Nov;29(21):3579-3587.e7.
- 681 7. Valera G, Markov DA, Bijari K, Randlett O, Asgharsharghi A, Baudoin JP, et al. A  
682 neuronal blueprint for directional mechanosensation in larval zebrafish. *Curr Biol*. 2021  
683 Apr;31(7):1463-1475.e6.
- 684 8. Dow E, Jacobo A, Hossain S, Siletti K, Hudspeth AJ. Connectomics of the zebrafish's  
685 lateral-line neuromast reveals wiring and miswiring in a simple microcircuit. *eLife*. 2018  
686 Jun 12;7:e33988.
- 687 9. Lush ME, Diaz DC, Koenecke N, Baek S, Boldt H, St Peter MK, et al. scRNA-Seq reveals  
688 distinct stem cell populations that drive hair cell regeneration after loss of Fgf and Notch  
689 signaling. *eLife*. 2019 Jan 25;8:e44431.
- 690 10. Carulli D, de Winter F, Verhaagen J. Semaphorins in Adult Nervous System Plasticity and  
691 Disease. *Front Synaptic Neurosci*. 2021 May 11;13:672891.



- 692 11. Yazdani U, Terman JR. The semaphorins. *Genome Biol.* 2006;7(3):211.
- 693 12. de Winter F, Kwok JCF, Fawcett JW, Vo TT, Carulli D, Verhaagen J. The Chemorepulsive  
694 Protein Semaphorin 3A and Perineuronal Net-Mediated Plasticity. *Neural Plast.*  
695 2016;2016:1–14.
- 696 13. Coate TM, Spita NA, Zhang KD, Isgrig KT, Kelley MW. Neuropilin-2/Semaphorin-3F-  
697 mediated repulsion promotes inner hair cell innervation by spiral ganglion neurons. *eLife.*  
698 2015 Aug 24;4:e07830.
- 699 14. Carcea I, Patil SB, Robison AJ, Mesias R, Huntsman MM, Froemke RC, et al. Maturation  
700 of cortical circuits requires Semaphorin 7A. *Proc Natl Acad Sci.* 2014 Sep  
701 23;111(38):13978–83.
- 702 15. Inoue N, Nishizumi H, Naritsuka H, Kiyonari H, Sakano H. Sema7A/PlxnC1 signaling  
703 triggers activity-dependent olfactory synapse formation. *Nat Commun.* 2018  
704 Dec;9(1):1842.
- 705 16. Inoue N, Nishizumi H, Ooyama R, Mogi K, Nishimori K, Kikusui T, et al. The olfactory  
706 critical period is determined by activity-dependent Sema7A/PlxnC1 signaling within  
707 glomeruli. *eLife.* 2021 Mar 29;10:e65078.
- 708 17. Morote-Garcia JC, Napiwotzky D, Köhler D, Rosenberger P. Endothelial Semaphorin 7A  
709 promotes neutrophil migration during hypoxia. *Proc Natl Acad Sci.* 2012 Aug  
710 28;109(35):14146–51.
- 711 18. Nishide M, Kumanogoh A. The role of semaphorins in immune responses and  
712 autoimmune rheumatic diseases. *Nat Rev Rheumatol.* 2018 Jan;14(1):19–31.
- 713 19. Köhler D, Granja T, Volz J, Koeppen M, Langer HF, Hansmann G, et al. Red blood cell-  
714 derived semaphorin 7A promotes thrombo-inflammation in myocardial ischemia-  
715 reperfusion injury through platelet GPIb. *Nat Commun.* 2020 Dec;11(1):1315.
- 716 20. Pham TL, He J, Kakazu AH, Jun B, Bazan NG, Bazan HEP. Defining a mechanistic link  
717 between pigment epithelium-derived factor, docosahexaenoic acid, and corneal nerve  
718 regeneration. *J Biol Chem.* 2017 Nov;292(45):18486–99.
- 719 21. Xie J, Wang H. Semaphorin 7A as a potential immune regulator and promising

- 720 therapeutic target in rheumatoid arthritis. *Arthritis Res Ther*. 2017 Dec;19(1):10.
- 721 22. Dow E, Siletti K, Hudspeth AJ. Cellular projections from sensory hair cells form polarity-  
722 specific scaffolds during synaptogenesis. *Genes Dev*. 2015 May 15;29(10):1087–94.
- 723 23. Pujol-Martí J, Faucherre A, Aziz-Bose R, Asgharsharghi A, Colombelli J, Trapani JG, et  
724 al. Converging Axons Collectively Initiate and Maintain Synaptic Selectivity in a Constantly  
725 Remodeling Sensory Organ. *Curr Biol*. 2014 Dec;24(24):2968–74.
- 726 24. De Wit J, De Winter F, Klooster J, Verhaagen J. Semaphorin 3A displays a punctate  
727 distribution on the surface of neuronal cells and interacts with proteoglycans in the  
728 extracellular matrix. *Mol Cell Neurosci*. 2005 May;29(1):40–55.
- 729 25. Sharma P, Ruel TD, Kocha KM, Liao S, Huang P. Single cell dynamics of embryonic  
730 muscle progenitor cells in zebrafish. *Development*. 2019 Jan 1;dev.178400.
- 731 26. Keenan SR, Currie PD. The Developmental Phases of Zebrafish Myogenesis. *J Dev Biol*.  
732 2019 Jun 2;7(2):12.
- 733 27. Sato A, Koshida S, Takeda H. Single-cell analysis of somatotopic map formation in the  
734 zebrafish lateral line system. *Dev Dyn*. 2010 Jul;239(7):2058–65.
- 735 28. Shen K, Cowan CW. Guidance Molecules in Synapse Formation and Plasticity. *Cold*  
736 *Spring Harb Perspect Biol*. 2010 Apr 1;2(4):a001842–a001842.
- 737 29. Um JW, Ko J. Neural Glycosylphosphatidylinositol-Anchored Proteins in Synaptic  
738 Specification. *Trends Cell Biol*. 2017 Dec;27(12):931–45.
- 739 30. Uesaka N, Uchigashima M, Mikuni T, Nakazawa T, Nakao H, Hirai H, et al. Retrograde  
740 semaphorin signaling regulates synapse elimination in the developing mouse brain.  
741 *Science*. 2014 May 30;344(6187):1020–3.
- 742 31. Sheets L, Hagen MW, Nicolson T. Characterization of Ribeye Subunits in Zebrafish Hair  
743 Cells Reveals That Exogenous Ribeye B-Domain and CtBP1 Localize to the Basal Ends  
744 of Synaptic Ribbons. Riley B, editor. *PLoS ONE*. 2014 Sep 10;9(9):e107256.
- 745 32. Oliva C, Escobedo P, Astorga C, Molina C, Sierralta J. Role of the maguk protein family in  
746 synapse formation and function. *Dev Neurobiol*. 2012 Jan;72(1):57–72.
- 747 33. Suli A, Pujol R, Cunningham DE, Hailey DW, Prendergast A, Rubel EW, et al. Innervation

- 748 regulates synaptic ribbons in lateral line mechanosensory hair cells. *J Cell Sci.* 2016 Jan  
749 1;jcs.182592.
- 750 34. Taschenberger H, Leão RM, Rowland KC, Spirou GA, von Gersdorff H. Optimizing  
751 Synaptic Architecture and Efficiency for High-Frequency Transmission. *Neuron.* 2002  
752 Dec;36(6):1127–43.
- 753 35. Myers JP, Gomez TM. Focal Adhesion Kinase Promotes Integrin Adhesion Dynamics  
754 Necessary for Chemotropic Turning of Nerve Growth Cones. *J Neurosci.* 2011 Sep  
755 21;31(38):13585–95.
- 756 36. O'Donnell M, Chance RK, Bashaw GJ. Axon Growth and Guidance: Receptor Regulation  
757 and Signal Transduction. *Annu Rev Neurosci.* 2009 Jun 1;32(1):383–412.
- 758 37. Gilmour D, Knaut H, Maischein HM, Nüsslein-Volhard C. Towing of sensory axons by  
759 their migrating target cells in vivo. *Nat Neurosci.* 2004 May;7(5):491–2.
- 760 38. Metcalfe WK. Sensory neuron growth cones comigrate with posterior lateral line  
761 primordial cells in zebrafish. *J Comp Neurol.* 1985 Aug 8;238(2):218–24.
- 762 39. Gasanov EV, Rafieva LM, Korzh VP. BDNF-TrkB Axis Regulates Migration of the Lateral  
763 Line Primordium and Modulates the Maintenance of Mechanoreceptor Progenitors. Proost  
764 P, editor. *PLOS ONE.* 2015 Mar 9;10(3):e0119711.
- 765 40. Schuster K, Dambly-Chaudière C, Ghysen A. Glial cell line-derived neurotrophic factor  
766 defines the path of developing and regenerating axons in the lateral line system of  
767 zebrafish. *Proc Natl Acad Sci.* 2010 Nov 9;107(45):19531–6.
- 768 41. Germanà A, Laurà R, Montalbano G, Guerrera MC, Amato V, Zichichi R, et al. Expression  
769 of Brain-Derived Neurotrophic Factor and TrkB in the Lateral Line System of Zebrafish  
770 During Development. *Cell Mol Neurobiol.* 2010 Jul;30(5):787–93.
- 771 42. Ji YR, Warriar S, Jiang T, Wu DK, Kindt KS. Directional selectivity of afferent neurons in  
772 zebrafish neuromasts is regulated by Emx2 in presynaptic hair cells. *eLife.* 2018 Apr  
773 19;7:e35796.
- 774 43. Kindt KS, Finch G, Nicolson T. Kinocilia Mediate Mechanosensitivity in Developing  
775 Zebrafish Hair Cells. *Dev Cell.* 2012 Aug;23(2):329–41.

- 776 44. Obholzer N, Wolfson S, Trapani JG, Mo W, Nechiporuk A, Busch-Nentwich E, et al.  
777 Vesicular Glutamate Transporter 3 Is Required for Synaptic Transmission in Zebrafish  
778 Hair Cells. *J Neurosci*. 2008 Feb 27;28(9):2110–8.
- 779 45. Kwan KM, Fujimoto E, Grabher C, Mangum BD, Hardy ME, Campbell DS, et al. The  
780 Tol2kit: A multisite gateway-based construction kit for Tol2 transposon transgenesis  
781 constructs. *Dev Dyn*. 2007 Nov;236(11):3088–99.
- 782 46. Arshadi C, Günther U, Eddison M, Harrington KIS, Ferreira TA. SNT: a unifying toolbox  
783 for quantification of neuronal anatomy. *Nat Methods*. 2021 Apr;18(4):374–7.
